1 ***SITPD1* IS REQUIRED TO SPECIFY TAPETUM IDENTITY AND FOR THE**  
2 **REGULATION OF REDOX HOMEOSTASIS IN TOMATO ANTHERS**

3 Blanca Salazar-Sarasua, María Jesús López-Martín, Edelín Roque, Rim Hamza, Luis  
4 Antonio Cañas, José Pío Beltrán, Concepción Gómez-Mena\*

5 \* Corresponding author: [cgomez@ibmcp.upv.es](mailto:cgomez@ibmcp.upv.es)

6 **AUTHOR CONTRIBUTIONS**

7 C G-M designed the research and wrote the grant that founded the project. B S-S, MJ L-  
8 M, RH and ER performed the experiments. C G-M and B S-S wrote the manuscript. LA  
9 C and JP B supervised the study and reviewed the manuscript. All the authors agreed  
10 with the final version of the manuscript.

11

12 **RUNNING TITLE**

13 *SITPD1* is required for tapetum development in tomato

14

15

16 **One sentence summary**

17 The small protein SITPD1 is required for tapetum formation in tomato, highlighting the  
18 role of this tissue in the regulation of redox homeostasis during male gametogenesis.

19

20 **TOTAL WORD COUNT: 6639**

21 Number of figures: 9

22 Number of tables: 1

23 Supporting information: 4 figures, 3 tables (1 of them as an excel file).

24 **ABSTRACT**

25 The tapetum is a specialized layer of cells within the anther adjacent to the sporogenic  
26 tissue. During its short life, it provides nutrients, molecules and materials to the pollen  
27 mother cells and microsporocytes being essential during callose degradation and pollen  
28 wall formation. However, the acquisition of tapetal cell identity in tomato plants is a  
29 process still poorly understood. We report here the identification and characterization of  
30 *SlTPD1* (*Solanum lycopersicum TPD1*), a gene specifically required for pollen  
31 development in tomato plants. Gene editing was used to generate loss-of-function  
32 *Sltpd1* mutants that showed absence of tapetal tissue. In these plants, sporogenous cells  
33 developed but failed to complete meiosis resulting in complete male sterility.  
34 Transcriptomic analysis conducted in wild-type and mutant anthers at an early stage  
35 revealed the down regulation of a set of genes related to redox homeostasis. Indeed,  
36 *Sltpd1* anthers showed a reduction of reactive oxygen species (ROS) accumulation at  
37 early stages and altered activity of ROS scavenging enzymes. The obtained results  
38 highlight the importance of ROS homeostasis in the interaction between the tapetum  
39 and the sporogenous tissue in tomato plants.

40 **KEY WORDS:** Anther, male sterility, pollen, ROS, tapetum, tomato (*Solanum*  
41 *lycopersicum*), *TPD1*

42

## 43 INTRODUCTION

44 Sexual reproduction in both animals and plants requires the formation of haploid  
45 gametes in a complex and highly regulated process. Quite unlike animals, in flowering  
46 plants the gametes are produced post embryonically within specialized organs, the ovary  
47 and the anther. The female gametophyte (embryo sac) is produced from a germline  
48 originated in the ovules inside the ovary, while male gametophytes (pollen) originate  
49 inside the anther. The formation of gametes in plants occurs late in development and  
50 does not depend on meristems but on cell-to-cell communication or tissue interactions.

51 The anther shows a relatively simple morphological structure and high accessibility  
52 being the object of numerous studies on the sexual reproduction of plants. Shortly after  
53 anther primordia initiation, several somatic and germinal cells originate. Typically, the  
54 primordia contains three cells layers (L1-L3) that will originate the external epidermis,  
55 the archesporial cells and the inner vascular and connective tissue (Gómez et al., 2015;  
56 Åstrand et al., 2021). Archesporial cells further differentiate into three additional layers  
57 of somatic tissue: the endothecium, the middle layer and the tapetum, and a layer of  
58 microsporocytes (pollen mother cells, PMC). The tapetum layer, adjacent to the  
59 developing microsporocytes has a central role during pollen development and its  
60 premature or delayed degradation results in pollen abortion and male sterility (Liu et al.,  
61 2018; Bai et al., 2019).

62 Most of the genetic information on male gametogenesis was obtained in the model plant  
63 *Arabidopsis thaliana* and two monocot crops, rice and maize (Chang *et al.*, 2011; van  
64 der Linde & Walbot, 2019). In *Arabidopsis*, tapetal cell formation requires the joined  
65 action of EMS1/EXS (EXCESS MICROSPOROCTES1/EXTRA SPOROGENOUS  
66 CELLS) a putative Leucin-rich repeat (LRR) receptor kinase (Canales et al., 2002; Zhao  
67 et al., 2002) and its ligand the small peptide TPD1 (TAPETUM  
68 DETERMINANT1)(Yang et al., 2003; Huang et al., 2016b). In rice, a similar  
69 receptor/ligand complex is encoded by the *MSP1* (*MULTIPLE SPOROCTE1*) and  
70 *TDLIA* genes (Nonomura et al., 2003; Zhao et al., 2008) while in maize a *TPD1*  
71 homolog, *MAC1*(*MULTIPLE ARCHESPORIAL CELLS1*)/*MIL2* gene (Hong et al.,  
72 2012a; Wang et al., 2012), was identified. Downstream of this complex, several genes  
73 such as *BRI1 EMS SUPPRESSOR* (*BES1*), *DYT1* (*DYSFUNCTIONAL TAPETUM1*),  
74 *DEFECTIVE IN TAPETAL DEVELOPMENT AND FUNCTION1* (*TDF1*) and  
75 *MYB33/65* are required for early tapetal development and function in *Arabidopsis*

76 (Millar and Gubler, 2005; Zhu et al., 2008; Gu et al., 2014; Chen et al., 2019). At late  
77 stages, *MALE STERILITY1 (MS1)* and *AMS* regulate pollen formation and maturation  
78 (Ito and Shinozaki, 2002; Sorensen et al., 2003). Despite small differences, extensive  
79 research in Arabidopsis and rice suggests that the genetic pathway controlling tapetum  
80 development is highly conserved in plants (Wilson and Zhang, 2009; Zhang and Yang,  
81 2014; Lei and Liu, 2020).

82 In tomato, male sterility is a desirable trait to be used in hybrid seed production and  
83 cross breeding programs. Over 50 male sterile mutants were isolated more than two  
84 decades ago (Gorman and McCormick, 1997) and still only a limited amount of genes  
85 involved in male gametogenesis have been identified. Mutations in the tomato  
86 *SPOROCTELESS/NOOZLE* orthologue prevent the formation of both male and  
87 female sporocytes and the plants are fully sterile (Hao *et al.*, 2017; Rojas-Gracia *et al.*,  
88 2017). Downstream of this gene, *Ms10<sup>35</sup>* gene (*DYT1* homolog) encodes a bHLH  
89 transcription factor specifically expressed in tapetal tissue and meiocytes (Jeong et al.,  
90 2014). Another bHLH protein (Solyc01g081100) has been proposed as the best  
91 candidate to encode the tomato *Ms32* gene (Liu et al., 2019). *Solyc01g081100* gene is a  
92 homolog of the Arabidopsis *bHLH10/89/90* gene that together with DYT1-MYB35  
93 form a regulatory module to regulate tapetum and pollen development (Cui et al., 2016).

94 In this work, we identified a gene that is specifically required for the specification of the  
95 tapetal cells in tomato. The gene corresponds to the tomato homolog of the *TPD1*  
96 Arabidopsis gene, and was named *SITPD1 (Solanum lycopersicum TPD1)*. We obtained  
97 mutant plants by CRISPR/Cas9 technology that showed a male sterile phenotype  
98 associated with the absence of tapetal tissue. We studied the cytological and molecular  
99 changes of the anther and in particular the effect in sporogenous cell development in the  
100 mutant plants. Our results provide evidence for a regulatory role of the tapetum in the  
101 progression of male gametogenesis through the modulation of redox homeostasis.

102

## 103 **RESULTS**

### 104 **Identification of the *Solanum lycopersicum SITPD1* gene.**

105 Following a gene homologue strategy, we selected a gene candidate to be involved in  
106 tapetum development in tomato. *TPD1 (TAPETUM DETERMINANT1)* (Yang *et al.*,

107 2003) was used as a bait in the Plant Comparative platform Phytozome (Goodstein et  
108 al., 2012) (<https://phytozome-next.jgi.doe.gov/>) and two homologous were identified  
109 (*Solyc03g097530* and *Solyc11g012650*). The expression of these genes was analyzed in  
110 vegetative tissues (leaves) and flower buds using qPCR. The results showed that  
111 *Solyc11g012650* was preferentially expressed in leaves while *Solyc03g097530* was  
112 expressed in developing flowers, reaching the highest level in flower at anthesis (Figure  
113 **S1**). Phylogenetic analyses were performed using a list of homologue genes from  
114 different plant species obtained in a BLAST search using *TPD1* gene (*At4g24972*) as a  
115 bait. These sequences also included the Arabidopsis closest homolog *At1g32583* and the  
116 rice orthologue *OsTDL1A* (Zhao et al., 2008). In the phylogenetic tree, *Solyc03g097530*  
117 grouped with *TPD1* and related TPD1-like homologues from Solanaceae (Figure **1A**).

118 *Solyc03g097530* protein sequence (176aa) was aligned with Arabidopsis TPD1 and two  
119 protein homologs functionally characterized: TDL1A from rice (Zhao *et al*, 2008) and  
120 MAC1 from maize (Wang et al., 2012). The proteins showed high amino acid identity  
121 mainly in the C-terminal region with six highly conserved cysteine residues and a  
122 putative dibasic cleavage site (Figure **1B**). In addition, SITPD1 protein and homologs  
123 contain a predicted signal peptide at their N-terminal regions (Figure **1B**; underlined).  
124 The subcellular location of the protein was determined by fusing the Yellow  
125 Fluorescent protein (YFP) to the C terminal end of SITPD1 and transiently expressed in  
126 *Nicotiana benthamiana* leaves. The control protein (35S:GFP) exhibited both  
127 cytoplasmic and nuclear localization (Figure **1C**) while SITPD1-YFP protein was  
128 localized in proximity of the plasma membrane where it formed small dots, and in the  
129 cytosol as large aggregates (Figure **1C**). This result suggests that SITPD1 protein could  
130 be secreted to the extracellular space.

131 Gene orthology and local microsynteny or collinearity was inferred by *in silico*  
132 analyses. The use of the Gene Orthology View in the PLAZA platform (Van Bel et al.,  
133 2018) confirmed that *Solyc03g097530* is the best orthologous candidate for *TPD1* in  
134 tomato (Figure **S2A**). We then looked for microsynteny in the flanking regions where  
135 the two genes are located and found collinearity between these two regions (Figure  
136 **S2B**). Therefore, we considered *Solyc03g097530* the strongest candidate to be the *TPD1*  
137 orthologous in tomato and renamed it *SITPD1* (*Solanum lycopersicum TPD1*).

138 To evaluate the conservation of *SITPD1* function during the development of the anther  
139 we designed an experiment to complement a loss-of-function *tpd1* mutant. We used a

140 mutant line (N843482, *tpd1* mutant) that contains a T-DNA insertion in the *TPD1* gene.  
141 Mutant plants were indistinguishable from the wild type except for the anthers that did  
142 not produce pollen grains (Figure 1C). To complement the mutant phenotype, we  
143 generated a genetic construct by fusing 2.7 kb of the promoter region of Arabidopsis  
144 *TPD1* and the coding sequence of *SITPD1* that was used to genetically transform  
145 heterozygous *tpd1* plants. We obtained 32 independent transformants and four of them  
146 were homozygous for the mutation. These four plants produced viable pollen (Figure  
147 1D) and seeds and therefore, were fertile, demonstrating the ability of *SITPD1* protein  
148 to replace *TPD1* function.

### 149 **Expression of *SITPD1* during tomato plant development**

150 The expression of *SITPD1* was analyzed in different plant tissues including seedlings  
151 (apical and basal regions), leaves and developing flowers using qPCR. The gene was  
152 expressed in all the tissues analyzed reaching the highest level in flowers at anthesis  
153 (Figure 2A). The spatial and temporal pattern of expression of *SITPD1* was evaluated  
154 during flower development using *in situ* hybridization (Figure 2B-G). *SITPD1* RNA  
155 was not detectable in inflorescence meristems and flower buds before anther  
156 primordium differentiated (Figure 2B). Expression was first detected at floral stage 6 at  
157 the internal layers of the developing anther that will generate the sporogenous tissue  
158 (Figure 2C, D). Later, at the tetrad stage, *SITPD1* transcript was localized at the tapetum  
159 and the microspores still surrounded by the callose wall. The expression of the gene  
160 continues during the following floral stages in the tapetal cells that gradually  
161 disintegrated and in the pollen grains (Figure 2E-G). On the ovary, we detected  
162 transient expression in ovule primordia of flower at stage 8 (Figure S3).

### 163 ***Sitpd1* mutants are male sterile and developed parthenocarpic fruits**

164 To study the function of *SITPD1*, tomato lines with mutations targeted to the third exon  
165 were generated using CRISPR/Cas9 (Figure 3A). Among the T0 generation, we selected  
166 six diploid plants that showed percentages of edition over eighty and that mostly  
167 contained biallelic mutations (Figure S4A). All the plants showed complete male  
168 sterility and developed seedless (parthenocarpic) fruits. Histological sections of the  
169 mature anthers revealed collapsed locules containing a dense debris but they did not  
170 contain viable pollen (Figure S4B). In these plants, we observed a strong correlation  
171 between male sterility and the development of parthenocarpic fruits (Figure S4C).

172 F<sub>2</sub> plants were obtained after pollination with wild-type pollen and stable single-  
173 mutation lines were obtained. Two mutant lines (*Sltpd1<sup>Del5</sup>* and *Sltpd1<sup>Del2</sup>*) containing  
174 deletions of 2 and 5 nucleotides respectively were chosen for further analysis (Figure  
175 **3A**). Mutant plants did not show morphological defects during vegetative development.  
176 However, after flower opening, we observed a small reduction in the stamen length,  
177 absence of pollen and slight protrusion of the pistil (Figure **3A**). For many crops,  
178 including tomato, the production of hybrids is an efficient way to increase plant  
179 production and improve their resistant to diseases and its performance under suboptimal  
180 environmental conditions (Labroo et al., 2021). Male-sterile tomato plants with  
181 protruding stiles, such as *Sltpd1* mutants, could be valuable parental lines for hybrid  
182 seed production. Despite male sterility, *Sltpd1* mutant plants produced seedless fruits  
183 that were smaller than those of wild-type plants with a decrease of about 70% in weight  
184 (Figure **3C**). Fruit shape, quantified as a width/height ratio, was not altered in *Sltpd1*  
185 mutants (Figure **3C**). When fertilized with wild-type pollen, the plants developed  
186 seeded fruits of a normal size.

#### 187 **Male gametogenesis fails to be completed in *Sltpd1* mutants**

188 To elucidate the biological function of *SITPDI* during male gametogenesis, we  
189 compared the development of anthers from the wild type and *Sltpd1* mutants. In wild-  
190 type tomato anthers, cells from the L2 layer differentiate into archesporial cells that  
191 undergo periclinal divisions (parallel to the epidermis) (Figure **4A**). In *Sltpd1* mutant,  
192 anther development was slightly different to the wild type showing cells with squared  
193 rather than rectangular shape and reduced number of periclinal divisions (Figure **4D**).  
194 From stage 8, we observed clear differences between the two genotypes. While  
195 epidermis, endothecium and middle cell layers were formed, tapetum was not present in  
196 the mutant and sporogenous cells seemed more abundant and disorganized compared to  
197 the wild type (Figure **4E**). At stage 10, wild-type microsporocytes completed meiosis  
198 and formed tetrads surrounded by callose and separated from the adjacent cell layers  
199 (Figure **4C**). Eventually, callose was degraded, releasing the microspores that continued  
200 to develop into mature pollen grains during floral stages 12 to 16 (Figure **4G-I**).  
201 Simultaneously, the tapetum started to degrade and was not visible by stage 16 (Figure  
202 **4I**). In the mutant anthers, microsporogenous cells continued to divide and enlarged in  
203 size (Figure **4F**). After extra rounds of divisions, the cells occupied the complete cavity  
204 of the locule (Figure **4J**). Cell counting showed that by floral stage 8 the number of



205 sporogenous cells in *Sltpd1* anther locules roughly doubled that of wild-type anthers  
206 ( $24.0 \pm 5.8$  versus  $49.0 \pm 4.7$  cells/locule section). At stage 10, sporogenous cell number  
207 further increased ( $66.1 \pm 11.3$  cells/locule section) and cells seemed to have initiated  
208 meiosis but failed to complete it (Figure 4J). Finally, cells degenerated causing the  
209 collapse of the anther locules and the deposition of a dense cell debris (Figure 4L, L).

210 We performed *in situ* hybridization essays using probes for the tapetum-specific  
211 *TomA5B* (*Solyc01g086830*) gene (Aguirre and Smith, 1993) and for the tomato  
212 homologue (*Solyc04g008070*) of the meiosis marker *SOLO DANCER* (*SDS*) gene  
213 (Azumi et al., 2002). In the wild type anther, *TomA5B* probe strongly hybridized with  
214 the tapetal cells at floral stages 8 and 10 (Figure 5A, B). The signal decreased  
215 dramatically by stage 12 when tapetum degeneration starts (Figure 5A). In the *Sltpd1*  
216 mutant anthers no signal was obtained in any of the floral stages analyzed (Figure 5D-  
217 F) confirming the complete absence of tapetum in the mutant plants. In the case of  
218 *SISDS* probe, the hybridization signal was first observed in the wild type at floral stage  
219 8 overlapping with meiosis initiation (Figure 5B). A similar result was obtained in the  
220 mutant anther detecting the expression of the gene at floral stage 8 (Figure 5B). These  
221 results indicate that meiosis was initiated in the mutant anthers although it failed to  
222 progress to the tetrad stage.

223 Callose deposition occurs around the sporogenous cells predating meiosis initiation and  
224 later between meiotic products (Jaffri and MacAlister, 2021). After meiosis completion,  
225 callose is quickly degraded after the release of callases ( $\beta$ 1-3 glucanases) by the  
226 tapetum. Using aniline blue staining the pattern of callose deposition and degradation  
227 was analyze in the mutant plants. In wild type anthers, the deposition of callose appears  
228 as an intense florescence signal around the tetrads that quickly disappears at the  
229 termination of meiosis (Figure 5C). In the mutant plants, the accumulation of callose  
230 was observed as a diffuse signal surrounding the sporogenous cells and the fluorescence  
231 signal persisted in time until the collapse of the anther locule (Figure 5C).

### 232 **Identification of global transcriptional changes associated to *SITPDI* loss-of-** 233 **function.**

234 To identify molecular and cellular components downstream of *SITPDI* action, RNAseq  
235 analyses were performed using anthers from floral stage 8 (meiotic stage). Differential  
236 expressed genes (DEG) were selected using a Q-value  $>0.1$  and p-value  $>0.05$ . From the



237 selected genes (801), 519 correspond to down-regulated genes and 282 to up-regulated  
238 genes (Figure 6A and Table S1).

239 At early floral stage 8, Gene Ontology (GO) analyses revealed enrichment in genes  
240 related to pollen and tapetum development (five out thirteen categories that correspond  
241 to 49 genes; Figure 6B and Table S1). Among these genes, homologs to *DYT1*, *AMS*,  
242 *MYB35* and *bHLH91* showed strong downregulation (Table 1). Accordingly, in  
243 Arabidopsis *DYT1* is required to activate the expression of  
244 *bHLH010/bHLH089/bHLH091* genes which in turn facilitate *DYT1* nuclear location  
245 and promote *MYB35* expression (Cui *et al.*, 2016). In addition, we detected strong  
246 downregulation of genes required during late stages of pollen development including a  
247 polygalacturonase homolog of the Arabidopsis *QRT3* gene involved in microspore  
248 separation (Rhee *et al.*, 2003) and a fatty acid-CoA reductase (Table 1).

249 When looking at signaling pathways, an important group of redox related genes was  
250 observed grouped under “cellular response to hydrogen peroxide” and “defense  
251 response”. A specific expression heat-map analysis of redox-related genes revealed  
252 differential expression of seventy genes, of which fifty-three were downregulated and  
253 seventeen were upregulated (Figure 6C and Table S1). Among the downregulated genes  
254 (Table 1), we detected two *Respiratory burst oxidase homolog (Rboh)* genes (also  
255 known as NADPH oxidases), key enzymes that catalyze the formation of ROS in plants  
256 and a glutaredoxin (GRX) that shows homology with the *MIL1* gene from rice involved  
257 in microspore development (Hong *et al.*, 2012b). Moreover, nine peroxidases are  
258 downregulated in the mutant anthers including homologues of the previously  
259 characterized PRX9 and PRX40 involved in pollen development in Arabidopsis  
260 (Jacobowitz *et al.*, 2019). Peroxidases are multifunctional proteins that catalyze the  
261 oxidation of a variety of substrates by H<sub>2</sub>O<sub>2</sub> and act as efficient components of the  
262 antioxidative system controlling ROS.

263 We analyzed the contribution of the genes involved in redox homeostasis to the  
264 development of the tomato anther. From the list of DEGs a subset of key ROS-related  
265 genes was selected, and its expression level were checked in anthers from different  
266 developmental stages (St6 to St20). The expression of two tomato *RBOH* genes  
267 (*SIRbohA/Solyc01g099620* and *SIRbohE/Solyc06g075570*) was analyzed by qPCR.  
268 Besides, we analyzed the expression of *SIRBOH1/SIRbohG*, recently identified as a  
269 brassinosteroid (BR)-regulated gene involved in tapetal cell degeneration and pollen

270 development (Yan *et al.*, 2020). In *Sltpd1* mutant anthers we detected an important  
271 reduction in the expression level of *SIRbohA* and *SIRbohE* at early stages of anther  
272 development (Figure 7A, B). The expression levels of *SIRBOH1/ SIRbohG* did not  
273 significantly change during the floral stages analyzed (Figure 7C).

274 The expression of the glutaredoxin-C9-like gene *SIGRXC9/Solyc08g036570* was  
275 analyzed and high levels of expression were detected in the wild type at the earliest  
276 stages analyzed (floral stage 6 and 8), while in the mutant samples the expression level  
277 was greatly reduced (Figure 7A). The expression of two TGA-like transcription factors  
278 (*Solyc06g074320/SITGA9* and *Solyc10g078670/SITGA10*), downregulated in the RNA-  
279 seq, were also analyzed. Quantitative qPCR experiments indicated that while *SITGA9*  
280 showed reduced expression in the mutant in floral stages 8, 14 and 15, *SITGA10*  
281 expression was strongly reduced in the mutant anthers from floral stage 8 and this low  
282 level persisted until floral stage 16 (Figure 7B, C). In Arabidopsis, ROXY1/ROXY2  
283 glutaredoxins interact with TGA9/TGA10 transcription factors in the regulation of  
284 anther development (Murmu *et al.*, 2010).

285 Globally, the expression analyses suggested that the absence of *SITPD1* and its  
286 downstream genetic network prevent the activation of the genes involved in the  
287 modulation of ROS levels, especially during early stages of anther development.

### 288 **ROS accumulation is lower in *Sltpd1* anthers than in the wild type at early** 289 **developmental stages**

290 The presence of reactive oxidative species was tested in the anthers of wild type and  
291 *Sltpd1* mutant plants. We analyzed and quantified the presence of superoxide anion  
292 ( $O_2^{\cdot-}$ ) and  $H_2O_2$ , considered the major ROS forms in plant cells (Huang *et al.*, 2019),  
293 using 3-3'-diaminobenzidine (DAB) and nitroblue tetrazolium (NBT) staining,  
294 respectively. Quantification of NBT-staining of the anthers, a proxy for superoxide  
295 anion presence, detected the highest levels at floral stages 8 and 10 but no differences  
296 were observed between wild-type and mutant anthers (Figure 7A). DAB quantification  
297 showed that in both wild-type and mutant anthers, the level of  $H_2O_2$  is higher at floral  
298 stage 8 and then decreases progressively. Interestingly, at early stages (St8 and St10) the  
299 level of  $H_2O_2$  was significantly lower in *Sltpd1* than in the wild type (Figure 7B). These  
300 results suggest that a critical  $H_2O_2$  threshold should be reached during early stages of  
301 anther development concurring with the meiotic stage.

302 In plants, the maintenance of ROS levels also relies on the action of non-enzymatic and  
303 enzymatic scavenging mechanisms. This last mechanism include enzymes such as,  
304 superoxide dismutase (SOD), catalase (CAT) and peroxidases (PRX) (Huang *et al.*,  
305 2019). To study the functionality of these enzymatic scavenging mechanism in the  
306 flowers of the mutant plants, we measured SOD and PRX activities. Compared to the  
307 wild type, SOD activity showed significant reduction in the mutant plants at floral  
308 stages 6 (premeiotic), 16 (pollen mitosis) and 20 (anthesis) (Figure 8C). Remarkably,  
309 PRX activity was much reduced in *Sitpd1* mutant anthers (Figure 8D) in agreement with  
310 the global downregulation of peroxidases shown in the RNA-seq experiment (Table 1).

## 311 DISCUSSION

### 312 ***SITPD1* is required for tapetum formation and pollen development in tomato.**

313 The stamens are the male reproductive organs of angiosperms and the place where the  
314 pollen is produced within the flower. The different tissues that compose anthers  
315 sequentially develop from the anther primordia suggesting that cell-to-cell  
316 communication is critical to coordinate growth and development (van der Linde and  
317 Walbot, 2019). The tapetum is the limiting tissue between the somatic and germinal  
318 cells and it is in a dynamic state during its short life period facilitating the pass of  
319 nutrients and molecules to the sporogenous cells and microspores (Pacini and Cresti,  
320 1978).

321 In this study, we evince the pivotal role of the tapetal tissue during pollen development  
322 throughout the isolation and characterization of the *SITPD1* gene. *SITPD1* shows  
323 homology with the TPD1 protein from Arabidopsis and, when transformed into the *tpd1*  
324 mutant, it was sufficient to complement the fertility defects. In addition, protein  
325 sequence alignments showed strong domain conservation also with the monocot  
326 proteins TDL1A/MIL2 and MAC1 from rice and maize. Therefore, *SITPD1* is the  
327 ortholog of the TPD1, MAC1 and TDL1A/MIL2 genes and the first gene ortholog  
328 identified in a fleshy fruit plant. On the other hand, although in tomato the putative  
329 receptor for *SITPD1* protein has not been yet identified, our data suggest the  
330 conservation of the receptor/ligand module also in tomato plants.

331 In Arabidopsis, mutant plants in either *EMSI* (TPD1 receptor) or *TPD1* genes share a  
332 phenotype, the lack of tapetum and the production of extra sporocytes at the expense of  
333 tapetal cells (Zhao *et al.*, 2002; Yang *et al.*, 2003). We detected the expression of

334 *SITPDI* by *in situ* hybridization on the anther wall early in development until late stages  
335 where it appeared associated to the tapetum and microsporocytes. In this aspect,  
336 *SITPDI* slightly differs from *TPDI* that is preferentially expressed in microsporocytes  
337 while *EMS* is predominantly expressed in tapetum (Zhao *et al.* 2002; Yang *et al.* 2003).  
338 In maize, *MAC1* is expressed early in anther ontogeny where it suppresses archesporial  
339 cell proliferation, suggesting that cell position, rather than lineage regulates cell fate  
340 determination during anther development (Wang *et al.*, 2012). This hypothesis is in  
341 agreement with the phenotype of *Sltpd1* mutants that showed defects in the shape and  
342 pattern of division of the archesporial cells. It has been shown that ectopic expression of  
343 *TPDI* activates cell division possibly by regulating the expression of cell-cycle genes  
344 (Huang *et al.*, 2016a). Taken together, we propose a dual role for *SITPDI* in the control  
345 of archesporial cell divisions and the determination of tapetal cell identity in tomato  
346 plants.

347 Most *TPDI* homologs are expressed in different tissues outside the anther including  
348 leaves, roots, seedlings (Yang *et al.*, 2003; Hong *et al.*, 2012a; Wang *et al.*, 2012) and  
349 ovules (Yang *et al.*, 2005; Wang *et al.*, 2012). At present, a possible role of these  
350 proteins during vegetative development remains elusive. However, in monocots *TPDI*  
351 orthologs have been reported to control megaspore mother cell proliferation during  
352 ovule development (Sheridan *et al.*, 1996; Zhao *et al.*, 2008). Using *in situ*  
353 hybridization, the expression of *SITPDI* was detected in anthers and the developing  
354 ovules. *Sltpd1* mutant plants did not show obvious defects in ovule development and  
355 flowers formed normal seeded fruits when pollinated with wild-type pollen. A peculiar  
356 and distinctive phenotype of the tomato *Sltpd1* mutants is the formation of seedless  
357 fruits (parthenocarpic). Parthenocarpy, the formation of fruits in the absence of  
358 pollination and fertilization, is often the consequence of the precocious activation of  
359 molecular events normally triggered by these processes (Molesini *et al.*, 2020). Also, it  
360 could be achieved by external applications of different hormones or growth regulators  
361 (Vivian-Smith and Koltunow, 1999). In tomato plants, several reports suggest a role for  
362 developing stamens or male gametophytes in the repression of ovary growth (Medina *et al.*  
363 *et al.*, 2013; Hao *et al.*, 2017; Rojas-Gracia *et al.*, 2017; Okabe *et al.*, 2019). Mutations in  
364 *SITPDI* caused complete male sterility and the production of small parthenocarpic  
365 fruits. This phenotype could support this repressive effect exerted by male  
366 gametogenesis progression. Alternatively, the abnormal progression of male

367 gametogenesis could result in the production of signaling molecules that indirectly  
368 activate premature ovary growth. In this regard, antisense plants targeting  
369 *SIRBOHB/SIWfi1* a tomato gene involved in the generation of ROS, show several  
370 developmental defects including parthenocarpic fruit development (Sagi et al., 2004).

### 371 ***SITPD1* and the control of redox homeostasis during pollen development**

372 Overlapping with the genetic network controlling anther development, additional  
373 factors and signalling molecules participate in the communication between the somatic  
374 and sporogenous tissues. These factors include hormones, secreted proteins, miRNAs  
375 and cellular redox state (Dukowic-Schulze and van der Linde, 2021). For instance, the  
376 analysis of gibberellin (GA) deficient mutants suggest that the primary site of hormone  
377 action are tapetal cells and low GA levels have an indirect effect on the formation of  
378 functional pollen grains (Aya *et al.*, 2009). Several lines of evidence support that  
379 cellular redox state is an important morphogenetic factor controlling cell differentiation  
380 and proliferation during anther development (Yu and Zhang, 2019).

381 Interestingly, while high concentration of reactive oxygen species (ROS) cause  
382 irreversible DNA damage and cell death, at low levels ROS act as signalling molecules  
383 regulating cell division and cell fate (Kelliher & Walbot, 2012; Yang *et al.*, 2018). The  
384 results presented in this study show that the absence of tapetal tissue in *Sltpd1* mutants  
385 have a huge impact in the transcription of genes involved in redox homeostasis in the  
386 anther at early stages. Moreover, a reduction in ROS levels seem to be associated with  
387 the failure of pollen mother cells to progress into meiosis. In agreement with this  
388 observation, pioneering work in maize showed that hypoxia triggers meiotic fate  
389 acquisition acting as a positional cue for germ cell production (Kelliher and Walbot,  
390 2012).

391 Besides the production of ROS as an end product of several metabolic processes, a  
392 specific enzymatic machinery is in charge of maintaining redox homeostasis in plants.  
393 ROS production relays on *RBOH* genes also known as NADPH oxidases, which  
394 catalyze the generation of superoxide radicals. Enzymatic scavenging mechanism  
395 involve SOD, CAT and peroxidases, although peroxidases can act as both ROS-  
396 generating and ROS-processing components (Mittler, 2017). Cellular changes of ROS  
397 levels can act as a signal to regulate differentiation and morphogenesis during  
398 reproductive development. In Arabidopsis, *RBOHE* is specifically expressed in the

399 tapetum and the genetic interference with the temporal ROS pattern resulted in altered  
400 tapetal PCD and male sterility (Xie *et al.*, 2014). In addition, PRX9 and PRX40 are  
401 extensin peroxidases specifically expressed in the tapetum that act as scavenging  
402 molecules contributing to tapetal cell wall integrity (Jacobowitz *et al.*, 2019). ROS  
403 signalling include glutaredoxins (GRXs) that act as sensors of the redox status, altering  
404 signal transduction pathways that result in biological responses (Song *et al.*, 2002).  
405 Studies in Arabidopsis, rice and maize highlighted the importance of GRXs in the  
406 formation of the anther and the differentiation of microsporocytes (Xing and Zachgo,  
407 2008; Hong *et al.*, 2012b; Kelliher and Walbot, 2012). In rice, a mutation in the anther-  
408 specific glutaredoxin *MICROSPORELESS1 (MILI)* prevent the completion of the  
409 meiosis during male gametogenesis. *MILI* encodes a CC-type glutaredoxin that  
410 specifically interact with TGA transcription factors (Hong *et al.*, 2012b). In  
411 Arabidopsis, *ROXY1* and *ROXY2* encode also CC-type glutaredoxins and are required  
412 for the formation of the adaxial anther lobe possibly with other GRXs or redox  
413 regulators. *ROXY1* and *ROXY2* proteins are able to interact with the TGA transcription  
414 factors TGA9 and TGA10 in tobacco leaves (Xing and Zachgo, 2008). These authors  
415 suggest that this interaction results in the modification of TGA9/10 and its activation as  
416 a transcriptional factor (Murmu *et al.*, 2010). A similar genetic network to the one  
417 described in rice and Arabidopsis should operate in tomato anthers where ROS  
418 produced in the tapetal cells orchestrate anther wall development and pollen mother  
419 cells progression into meiosis. Using a tomato mutant lacking the tapetum, we identified  
420 several elements of this network that were included in the proposed working model  
421 (Figure 9). ROS produced by RBOHs (*SIRbohB* and *SIRbohE*) and peroxidases results  
422 in the accumulation of H<sub>2</sub>O<sub>2</sub> in tapetal tissue. Glutaredoxins, including *SIGRXC9*, could  
423 target TGA transcription factors (*SITGA9* and *SITGA10*) for activation, regulating then  
424 the expression of a set of genes required for further stages of pollen and anther  
425 development. This genetic network is severely affected by the absence of *SITPDI* and  
426 the concomitant loss of the tapetal tissues, at early stages of anther formation.

427 In the present study, we identified and characterized the tomato gene *SITPDI* that has a  
428 central role in pollen formation. Using CRISPR/Cas9 technology, we generated male  
429 sterile tomato plants that specifically lack tapetal tissue to gain insight into the genetic  
430 network and molecular signals regulating pollen formation in this species. Based on the



431 obtained information, a working model is proposed highlighting the role of ROS  
432 production and signalling during early stages of pollen development in tomato plants.

433

## 434 **MATERIALS AND METHODS**

### 435 **Plant material and growth conditions**

436 Tomato (*Solanum lycopersicum* L.) seeds from cultivar Moneymaker were grown in a  
437 greenhouse in pots with a 2:1:1 mixture of peat:vermiculite:perlite with a temperature  
438 regime of 25-30°C day and 18-20 °C night. Natural light was supplemented with lamps  
439 to obtain a 16h light/8 h night photoperiod. Flower samples were collected at different  
440 developmental stages according to bud size (Brukhin *et al.*, 2003). In this study, 8 floral  
441 stages were analyzed that correspond to the following sizes: St6 (0.3 cm), St8 (0.4 cm;  
442 meiotic), St10 (0.5 cm; tetrad of microspores), St12 (0.6 cm), St14 (0.7 cm), St16 (0.8  
443 cm; pollen mitosis), St18 (0.9 cm) and St20 (1 cm; anthesis). For the characterization of  
444 tomato fruits, size and weight of at least thirty fruits from the different genotypes were  
445 analyzed when fully ripe.

446 *Arabidopsis thaliana* Columbia (Col) plants were used as the wild-type genotype. The  
447 *tpd1* mutant corresponds to the T-DNA insertion line N843482 (SAIL\_1174\_B09)  
448 obtained from Nottingham Arabidopsis Stock Centre (NASC). The line was genotyped  
449 using the T-DNA specific primer LBb1 and the gene specific primer pair TPD1-  
450 LP1/TPD1-LP2 that amplifies 427 bp from the *TPD1* gene (Supplementary Table S2).  
451 Arabidopsis plants were grown in seed pots in a growth chamber with a 2:1:1 mixture of  
452 peat:vermiculite:peat at 21°C under long day conditions (16h light/8 h dark) and  
453 irrigated with Hoagland's solution.

### 454 **Phylogenetic analysis**

455 The phylogenetic tree was inferred by the neighbor-joining method using Poisson-  
456 corrected amino acid distances. A total of 1000 bootstrap pseudo-replicates were used to  
457 estimate reliability of internal nodes. Tree inference was performed using MEGA  
458 version 6 (Tamura *et al.*, 2013). The dataset comprised 18 *TPD1*-like genes from  
459 different plant species, obtained from GenBank database (Table S1).

### 460 **Plasmid assembly**



461 Construct for the complementation of the Arabidopsis *tpd1-2* mutant: A fragment of 2.7  
462 kb from the *TPD1* promoter (5' region of the gene) was fused to the coding sequence of  
463 the tomato *SITPD1* gene. First, both fragments were independently amplified by PCR  
464 and cloned into the intermediate vectors pENTRY 5' TOPO and pCR8 (Invitrogen),  
465 respectively. Second, a multisite gateway recombination reaction was performed to  
466 introduce both sequences into the binary destination vector pK7m24GW,3  
467 (<https://gateway.psb.ugent.be>) to obtain the final construct *pAtTPD1::SITPD1*.

468 Design of gRNA and CRISPR/Cas9 construct for *SITPD1* gene editing: For the design  
469 of optimal gRNAs, the target site was selected using the Breaking-Cas design tool  
470 (Oliveros *et al.*, 2016). This tool is freely available *on line*  
471 (<https://bioinfogp.cnb.csic.es/tools/breakingcas>). CRISPR/Cas9 plasmid assembly was  
472 performed using the Golden Braid (GB) modular framework and tools  
473 (<http://www.gbcloning.upv.es>). First, a single gRNA sequence was obtained by  
474 annealing of complementary primers and then assembled with GB1001 (U626  
475 promoter) and GB0645 (scaffold RNA) parts into the destination vector pDGB3 $\alpha$ 1. In  
476 successive multipartite GB reaction, this first module was assembled together with the  
477 GB0639 and GB0226 parts (containing hCas9 and *nptII* transcriptional units,  
478 respectively) into the final destination vector. The final construct was then transformed  
479 into *Agrobacterium tumefaciens* strain LBA4404. The primers used are listed in  
480 supplementary Table S2.

## 481 **Plant transformation**

482 Arabidopsis transgenic plants were obtained using the floral dip method (Clough and  
483 Bent, 1998). Briefly, plants were grown under long day conditions until flower  
484 transition occurs and then the main stem was removed to allow growing of secondary  
485 meristems. *Agrobacterium* inoculation (C58C1 strain carrying construct of interest) was  
486 performed by immersion of the shoots (2-5 cm length) in a suspension containing 5%  
487 sucrose and 0.05% Silwet L-77. Transformant plants were selected in the presence of  
488 kanamycin and transferred to soil for further analyses.

489 Tomato transformants were obtained by *in vitro* co-cultivation of the *Agrobacterium*  
490 strain LBA4404 (carrying the binary vector of interest) and cotyledon explants (Ellul *et*  
491 *al.*, 2003). Transformants were selected in the presence of kanamycin and after rooting,  
492 transferred to the greenhouse.

### 493 **Genotyping of CRISPR/Cas9 edited plants.**

494 Genomic DNA was extracted from young leaves or unopened flower buds. A 530 bp  
495 fragment from the *SITPD1* genomic region flanking the targeted region was amplified  
496 using oligos SITPD1G For and SITPD1G Rev, purified and sequenced. T0 plants with  
497 percentages of edition over 80% were selected using the *on line* tool TiDE  
498 (<http://shinyapps.datacurators.nl/tide/>) (Brinkman et al 2014). We then used the *on line*  
499 software ICE v2 CRISPR analysis tool (<https://ice.synthego.com/>) to identify the  
500 number and type of edition for each plant.

501 For the genotyping of stable and Cas9-free edited plants, PCR-based molecular markers  
502 were designed. We used Cleaved Amplified Polymorphic Sequences (CAPS) markers  
503 (Konieczny and Ausubel, 1993) that detect polymorphisms that occur in restriction  
504 sites. The deletions present in the *Sltpd1<sup>del2</sup>* and *Sltpd1<sup>del5</sup>* allele, generated new  
505 restriction sites for *BseGI* and *NcoI* enzymes, respectively. Using SITPD1G For and  
506 SITPD1G Rev oligos (Table S2) a 530bp fragment was obtained from genomic DNA.  
507 *BseGI* generated two fragments of 308 bp and 220 bp in the *Sltpd1<sup>del2</sup>* allele and *NcoI*  
508 generated two fragments of 299 bp and 226 bp in the *Sltpd1<sup>del5</sup>* allele. Neither of the  
509 enzymes cut the wild type fragment.

### 510 **Subcellular localization of SITPD1**

511 The coding sequence of *SITPD1* was cloned via Gateway LR reaction into the  
512 pEarleyGate101 vector (YFP fluorescent tag-containing)(Earley *et al.*, 2006) to generate  
513 the expression vector SITPD1-YFP. The vector was transformed into *Agrobacterium*  
514 *tumefaciens* strain C58 and used to agroinfiltrate 4-weeks-old *Nicotiana benthamiana*  
515 leaves. After 48 hours of the infiltration, the localization of the fluorescence fusion  
516 protein was determined on leaf disks by confocal scanning microscopy (LSM 780,  
517 Zeiss, Jena, Germany). A 35S:GFP construct was used as a control.

### 518 **Expression analyses by quantitative real-time PCR (qPCR)**

519 Total RNA was extracted from frozen tissue using the E.Z.N.A. Plant RNA Kit (Omega  
520 BioTek). RNA was treated with DNase I (Thermo Fisher Scientific) to remove  
521 genomic DNA and quantified in a NanoDrop ND-1000 Spectrophotometer (Thermo  
522 Fisher Scientific). For first-strand cDNA synthesis, one microgram of DNase-treated  
523 RNA was used for reverse transcription using a PrimerScript RT reagent kit (Takara)

524 and a mix of oligo poli-dT and random hexamers. The resulting cDNA was used for  
525 quantitative RT-PCR with the MasterMix qPCR ROX PyroTaq EvaGreen 5x (CmB)  
526 and the reaction was run on a QuantStudio 3 (Applied Biosystems). Relative expression  
527 levels were calculated by normalizing to the reference genes *ACT* (Arabidopsis  
528 experiments) or *SActin8* (tomato experiments) and using the  $\Delta\Delta C_t$  method. All primers  
529 showed amplification efficiencies between 90 and 110%. The primers used are listed in  
530 the supplementary Table S2.

### 531 **RNA *in situ* hybridization in tomato flowers.**

532 Fresh floral samples were fixed in FAE (4% formaldehyde, 5% acetic acid, 50%  
533 ethanol) overnight at 4°C, and afterwards, stored in 70% ethanol. Samples were  
534 embedded in paraffin using an automated tissue processor (Leica TP1020).

535 To generate gene specific probes cDNA fragments were cloned under T7/SP6 promoter  
536 sequences. For *SITPDI* a 284 bp DNA fragment from the 5' coding region was  
537 amplified by PCR using cDNA from flowers and cloned into the pGEM-T Easy vector  
538 (Promega). For *TomA5B* and *SISDS* genes, we used cDNA fragment of 442 bp and 440  
539 bp respectively. Digoxigenin-labelled probes were transcribed *in vitro* with T7 or SP6  
540 RNA polymerases. RNA was hybridized *in situ* (Huijser et al., 1992; Gómez-Mena and  
541 Roque, 2018) in paraffin-embedded sections (8µm) and color was detected with 5-  
542 bromo-4-chloroindol-3-yl phosphate/nitrateblue tetrazolium (BCIP/NBT) (Roche).

### 543 **Histological techniques**

544 For histological studies, tissue was fixed in FAE overnight at 4 °C and stored in 70 %  
545 ethanol. Samples were embedded in acrylic resin (Technovit 7100; Kulzer) according to  
546 the manufacturer's instructions. For histological analysis, resin sections were stained  
547 with 0.05 % toluidine blue in 0.1 M 6.8 pH phosphate buffer (O'Brien *et al.*, 1964) and  
548 visualized in a Leica DM 5000B microscope (Leica Microsystems) under bright field.

### 549 **Aniline blue staining in cryosections**

550 For assays in which fresh tissue was needed, samples were fixed in NEG-50 (Richard  
551 Alan Scientific), rapidly frozen in liquid nitrogen, and cut into 16 µm sections using a  
552 cryostat (Microm HM 520). Cryosections were stained for 10 minutes in the darkness  
553 with 0.5 % aniline blue in 0.07 mM sodium phosphate buffer, and visualized in a Leica  
554 DM 5000B microscope (Leica Microsystems).

555 **Pollen viability essay**

556 Alexander's staining was carried out as previously described (Peterson *et al.*, 2010)  
557 with 2 minutes of incubation at 50 °C on a hot plate. For pollen viability, pollen was  
558 released from the anthers by squeezing, stained and counted. Samples were visualized in  
559 a Leica DM 5000B (Leica Microsystems) microscope under bright field. For each  
560 sample, thirty anthers from five different flowers were used.

561 **Histochemical localization and quantification of hydrogen peroxide (H<sub>2</sub>O<sub>2</sub>) and**  
562 **superoxide radical (O<sub>2</sub><sup>-</sup>)**

563 Hydrogen peroxide localization was performed in anthers obtained from flowers in  
564 different developmental stages. Immediately after dissection, anthers were submerged in  
565 a 1 mg ml<sup>-1</sup> DAB-HCl (pH 3.8) solution for 16 hours under light conditions (Unger *et*  
566 *al.*, 2005), then cleared in 80 % ethanol for 20 minutes and observed in a binocular  
567 microscope (Leica Microsystems). Hydrogen peroxide levels were quantified following  
568 a similar method. After staining in DAB-HCl and clearing with ethanol, anthers were  
569 pulverized in liquid nitrogen, dissolved in 0.2 M HClO<sub>4</sub> and centrifuged at 12000g for  
570 10 minutes. The absorbance of the supernatant was quantified at 450 nm. H<sub>2</sub>O<sub>2</sub>  
571 concentrations were obtained through a standard curve for known hydrogen peroxide  
572 concentrations diluted with 0.2 M HClO<sub>4</sub>-DAB (Kotchoni *et al.*, 2006).

573 Superoxide radical was measured as formazan formation over time from tetrazolium  
574 blue. Flowers from different developmental stages were weighted, submerged in 50 mM  
575 potassium phosphate buffer (pH 7.8) containing 0.1% NBT and 10 mM sodium azide,  
576 left to stain for 2 hours and cleared in 70% ethanol. After staining, tissue was rapidly  
577 frozen in liquid nitrogen and ground. Formazan was selectively extracted using 200 µl  
578 of DMSO and absorbance was measured at 550 nm.

579 **Peroxidase (PRX) and superoxide dismutase (SOD) activity**

580 Flowers at different developmental stages were collected and frozen in liquid nitrogen.  
581 Frozen tissue was ground and homogenized in extraction buffer (0.1M Tris pH 7.0,  
582 0.1% ascorbic acid, 0.1% L-cysteine, 0.5M sucrose and 10mg/ml PVP) and centrifuged  
583 at 4°C for 15 minutes, saving the supernatant. Total protein was quantified using the  
584 Bradford method (Bradford, 1976). Briefly, 10 µl of crude extract were added to a tube  
585 containing 1 ml of Bradford solution (0.01% Coomassie Brilliant Blue G-250, 4.7%

586 ethanol, 8.5% phosphoric acid) and mixed. After two minutes, the absorbance was  
587 measured at 595 nm. A standard curve was generated using known concentrations of  
588 BSA.

589 For SOD activity, 25 mg of protein from the crude extract were added to 1ml of SOD  
590 buffer (50mM PBS pH7.6, 0.01mM EDTA, 50mM sodium carbonate, 12mM L-  
591 methionine, 10  $\mu$ M riboflavin, 50  $\mu$ M NBT) and incubated at room temperature under  
592 light conditions for 10 minutes. Absorbance was measured at 550 nm and SOD buffer  
593 without extract was used as a negative control. SOD activity was quantified as the  
594 amount of enzyme required to inhibit 50% of the photoreduction of NBT.

595 For PRX activity, 25 to 75 mg of protein from the crude extract were added to 1 ml of  
596 PRX buffer (0.85 mM hydrogen peroxide in HEPES pH7.0, 0.125M 4-aminoantipyrene,  
597 8.1 mg/ml phenol) and the change in absorbance was measured for 2 minutes at 510 nm.  
598 A standard curve was generated using known concentrations of horseradish peroxidase.

#### 599 **RNA-Seq analyses**

600 Total RNA was extracted from stage 8 stamens from the wild type and *Stpd1* plants.  
601 Frozen tissue using a NucleoSpin RNA Plant kit (Maschery-Nagel) and measured in a  
602 NanoDrop ND-1000 Spectrophotometer (Thermo Fisher Scientific). The RNA quality  
603 was assessed based on the RNA integrity number (RIN) using Bioanalyzer 2100  
604 (Agilent) and samples with RIN>8 were selected for the experiment. RNA sequencing  
605 was performed using the BGISEQ Technology platform at BGI (China). A total of three  
606 biological replicates were used for each sample set. GO enrichment, KEGG enrichment  
607 and statistical analysis were done through the Dr. Tom platform (BGI, China).

#### 608 **Statistical analysis**

609 IBM SPSS Statistics v.27 was used for statistical analysis. For each data set, a Shapiro-  
610 Wilk normality test was run. For normally distributed data, a Student-t test was used for  
611 pairwise comparison. Non-normally distributed data were analyzed with a Mann-  
612 Whitney test.

#### 613 **SUPPLEMENTAL DATA**

614 Figure S1. Expression pattern of two tomato *TPDI* gene homologs analyzed by  
615 quantitative RT-PCR in leaves and floral buds at different developmental stages.

616 Figure S2. *In silico* analyses of Arabidopsis and tomato *TPD1* gene homologs.  
617 Figure S3. Expression of *SITPD1* in the ovary detected using *in situ* hybridization.  
618 Figure S4. Characterization of CRISP/Cas9-mediated *SITPD1* edited tomato plants.  
619 Table S1. Accession numbers of *TPD1*-like gene sequences from different plant species  
620 used for the phylogenetic analysis.  
621 Table S2. Oligonucleotides used in this study.  
622 Table S3. List of differentially expressed genes (DEGs) between wild-type and *Sitpd1*  
623 mutant anthers from floral stage 8.

624

## 625 **ACKNOWLEDGMENTS**

626 This work was supported by grant RTI2018-094280-B-I00 funded by MCIN/AEI/  
627 10.13039/501100011033 and by FEDER “A way of making Europe”. We thank  
628 Aureliano Bombarely for his help in the conversion of gene IDs into Solyc identifiers,  
629 Diego Orzáez for providing GoldenBraid parts and Maricruz Rochina for expert  
630 technical assistance during the project.

631



632 **Table 1.** List of genes involved pollen development and reactive oxygen species (ROS)  
 633 homeostasis that showed down regulation in the anthers of *Sltpd1* mutants compared to  
 634 the wild type at floral stage 8.

| Gene ID                                                      | Gene homologue                               | log2        | Qvalue    |
|--------------------------------------------------------------|----------------------------------------------|-------------|-----------|
| <b>Anther wall tapetum development</b>                       |                                              |             |           |
| <i>Solyc02g079810</i>                                        | Transcription factor DYT1                    | -6.43964989 | 1.26E-76  |
| <i>Solyc08g062780</i>                                        | Transcription factor Aborted Microspores     | -7.58989677 | 3.02E-21  |
| <i>Solyc03g059200</i>                                        | MYB35                                        | -8.14777345 | 4.14E-62  |
| <i>Solyc01g081100</i>                                        | Transcription factor bHLH91-like             | -9.19738196 | 7.73E-64  |
| <b>Other genes related to pollen and anther development</b>  |                                              |             |           |
| <i>Solyc06g074320</i>                                        | Transcription factor TGA9                    | -0.9158745  | 1.48E-19  |
| <i>Solyc12g010170</i>                                        | Transcription factor bHLH66                  | -1.24356281 | 0.0094393 |
| <i>Solyc03g113850</i>                                        | Protein Jingubang                            | -2.52418827 | 2.03E-08  |
| <i>Solyc03g117800</i>                                        | Eceriferum 3                                 | -2.69271178 | 2.41E-39  |
| <i>Solyc06g051950</i>                                        | Bobber 1                                     | -2.94998503 | 3.36E-04  |
| <i>Solyc07g063180</i>                                        | Dynein light chain                           | -2.99548166 | 3.63E-32  |
| <i>Solyc03g120650</i>                                        | Pollen-specific kinase partner protein       | -3.03837744 | 2.86E-04  |
| <i>Solyc01g005510</i>                                        | L-ascorbate oxidase homolog                  | -3.41385131 | 0.0328411 |
| <i>Solyc07g052300</i>                                        | MYB101                                       | -4.56110971 | 2.39E-13  |
| <i>Solyc04g056360</i>                                        | Probable WRKY transcription factor 3         | -6.45522912 | 6.88E-24  |
| <b>Sporopollenin biosynthesis and pollen exine formation</b> |                                              |             |           |
| <i>Solyc02g068400</i>                                        | Polygalacturonase QRT3                       | -2.224485   | 5.13E-12  |
| <i>Solyc01g111070</i>                                        | Type III polyketide synthase B               | -4.43900397 | 6.36E-11  |
| <i>Solyc03g051960</i>                                        | Fatty acyl-CoA reductase 2                   | -6.20323505 | 1.05E-08  |
| <i>Solyc04g008780</i>                                        | Tetraketide alpha-pyrone reductase 1         | -8.93478906 | 5.77E-28  |
| <i>Solyc02g088710</i>                                        | 4-coumarate-CoA ligase-like 1                | -9.02558469 | 1.29E-17  |
| <i>Solyc01g090600</i>                                        | Type III polyketide synthase A               | -9.20644722 | 6.19E-11  |
| <i>Solyc10g009390</i>                                        | Cytochrome P450 703A2                        | -9.84385813 | 1.02E-17  |
| <i>Solyc07g015960</i>                                        | Spermidine hydroxycinnamoyl transferase      | -10.5269673 | 3.00E-14  |
| <i>Solyc01g010900</i>                                        | Cytochrome P450 704B1                        | -10.8055292 | 2.24E-10  |
| <i>Solyc03g053130</i>                                        | Strictosidine synthase-like 13               | -11.9186345 | 4.75E-11  |
| <b>ROS- related genes</b>                                    |                                              |             |           |
| <i>Solyc06g074320</i>                                        | Transcription factor TGA9                    | -0.9158745  | 1.48E-19  |
| <i>Solyc02g083620</i>                                        | L-ascorbate peroxidase 5                     | -0.99116313 | 0.0195753 |
| <i>Solyc08g062450</i>                                        | Class II small heat shock protein Le-HSP17.6 | -1.28889207 | 8.78E-04  |
| <i>Solyc07g048070</i>                                        | Cytochrome b561                              | -1.80370303 | 4.43E-05  |
| <i>Solyc02g084780</i>                                        | Peroxidase 72                                | -2.03908491 | 0.0020332 |
| <i>Solyc01g104860</i>                                        | Peroxidase 43-like                           | -2.50327644 | 0.0209080 |
| <i>Solyc01g090710</i>                                        | cMDH (cytosolic malate dehydrogenase)        | -3.30689847 | 2.74E-15  |
| <i>Solyc01g005510</i>                                        | L-ascorbate oxidase homolog                  | -3.41385131 | 0.0328411 |
| <i>Solyc08g036570</i>                                        | Glutaredoxin-C9-like (MIL1)                  | -3.43941376 | 1.62E-07  |
| <i>Solyc03g031880</i>                                        | Probable polyamine oxidase 4                 | -4.51662449 | 9.01E-34  |
| <i>Solyc10g047110</i>                                        | Peroxidase 43-like                           | -4.55372011 | 2.86E-08  |
| <i>Solyc08g075320</i>                                        | Abscisic acid 8'-hydroxylase 3               | -4.57900097 | 2.79E-04  |
| <i>Solyc03g078810</i>                                        | UDP-glycosyltransferase 76B1-like            | -4.58408135 | 5.30E-11  |
| <i>Solyc07g042460</i>                                        | Respiratory burst oxidase homolog protein E  | -4.83360202 | 5.37E-05  |
| <i>Solyc05g051730</i>                                        | Monothiol glutaredoxin-S6-like               | -4.83448598 | 0.0398049 |
| <i>Solyc01g099620</i>                                        | Respiratory burst oxidase homolog protein A  | -4.90590784 | 2.61E-45  |
| <i>Solyc04g080760</i>                                        | Peroxidase 9                                 | -4.98729283 | 4.09E-68  |
| <i>Solyc07g052550</i>                                        | Peroxidase 3-like                            | -5.23971051 | 3.43E-07  |
| <i>Solyc10g078670</i>                                        | bZIP transcription factor TGA10-like         | -5.24607495 | 1.22E-27  |
| <i>Solyc10g076190</i>                                        | Peroxidase 2-like                            | -6.05039275 | 0.0078115 |
| <i>Solyc02g014730</i>                                        | Cytochrome P450 86B1                         | -6.07748043 | 3.81E-06  |
| <i>Solyc01g058520</i>                                        | Peroxidase 40                                | -6.67248882 | 0         |
| <i>Solyc10g009390</i>                                        | Cytochrome P450 703A2                        | -9.84385813 | 1.02E-17  |



635 **FIGURE LEGENDS.**

636 **Figure 1.** *Solyc03g097530 (SITPD1)* encodes the ortholog of *TPD1* in tomato. A,  
637 Unrooted neighbor-joining tree of TPD1-like proteins. The numbers next to the internal  
638 nodes are bootstrap values from 1000 pseudo-replicates. B, Amino acid sequence  
639 alignment between the Arabidopsis and tomato gene homologs. The putative signal  
640 peptides are underlined, the six conserved cysteine residues are in bold and the potential  
641 dibasic cleavage site is highlighted with a red square. C, Subcellular localization of  
642 SITPD1 protein in *Nicotiana benthamiana* leaves as observed by confocal microscopy.  
643 D, Complementation of the male sterile floral phenotype of the Arabidopsis *tpd1* mutant  
644 using *SITPD1* gene. All the *tpd1; pTPD1:SITPD1* plants showed viable pollen. Scale  
645 bars in (D) correspond to 500  $\mu$ m.

646 **Figure 2.** Expression of *SITPD1* during plant development. A, Relative expression of  
647 *SITPD1* in different plant tissues analysed by qPCR. Data were normalized to the  
648 expression of *ACT10* gene and correspond to the mean ( $\pm$ SD) of three biological  
649 replicates. B-G, Localization of *SITPD1* transcript by *in situ* hybridization on  
650 reproductive meristems and developing flowers. St6: floral stage 6; St8: floral stage 8;  
651 St10: floral stage 10; St12: floral stage 12; St14: floral stage 14. SC: Sporogenous cells;  
652 MT: microspore tetrads; T: Tapetum; Mp: microspores; P: mature pollen.

653 **Figure 3.** Mutations in *SITPD1* result in empty anthers and seedless fruits. A, Guide  
654 RNA (in blue) was targeted to the third exon of *SITPD1*. B, Wild-type and *Sitpd1*  
655 flowers and opened fruits. *Sitpd1* plants showed flowers with protruding pistils (arrow)  
656 and seedless fruits. Scale bar: 0.5 cm. C, Fruit weight and shape (width/height ration) of  
657 the wild type, *Sitpd1*<sup>Del5</sup> and *Sitpd1*<sup>Del2</sup> plants ( $n \geq 40 \pm$  SD).

658 **Figure 4.** Pollen development is impaired in *Sitpd1* mutants. A-L, Histological sections  
659 of anther from the wild type (a-c and g-i) and *Sitpd1* mutant (D-F and J-L) at different  
660 developmental stages. Transveral section of anthers from floral stage 6 (A) and (D),  
661 floral stage 8 (B) and (E), floral stage 10 (C) and (F), floral stage 12 (G) and (J), floral  
662 stage 14 (H) and (K) and floral stage 16 (I and L). Floral stages have been named  
663 according to Brukhin et al 2003. Scale bar: 50  $\mu$ m. Ep: epidermis; En: endotecium; ML:  
664 middle layers; SC: sporogenous cells; T: tapetum; Td: tetrads; Mp: microspores; P:  
665 mature pollen.

666 **Figure 5.** *Sltpd1* mutant anthers specifically lack tapetal cells. A, *In situ* hybridization  
667 of the tapetum marker *TomA5B* in wild type and *Sltpd1* anthers. B, *In situ* hybridization  
668 of the meiosis marker *SISDS* in wild type and *Sltpd1* anthers at floral stage 8. C, Callose  
669 deposition in anthers as observed by aniline blue staining of wild type and *Sltpd1*. St8:  
670 floral stage 8; St10: floral stage 10; St12: floral stage 12. Scale bar: 50  $\mu$ m in (A) and  
671 (B); 100  $\mu$ m in (C).

672 **Figure 6.** Global gene expression changes in the anthers of *Sltpd1* mutants at floral stage  
673 8 in comparison with the wild type. A, Total number of DEGs between wild type and  
674 mutant anthers. B, GO biological process enrichment analysis. C, Expression heatmap  
675 of differentially expressed genes involved in pollen and anther development. D,  
676 Expression heatmap of differentially expressed ROS-related genes. Q-value < 0.05; p-  
677 value < 0.05.

678 **Figure 7.** Expression pattern of genes involved in redox homeostasis during anther  
679 development of the wild type and *Sltpd1* mutant plants. Quantitative RT-PCR of (A)  
680 *SIRbohA/Solyc01g099620* gene; (B) *SIRbohE/Solyc06g075570* gene; (C)  
681 *RBOH1/SIRbohG/Solyc08g081690* gene; (D) *SIGRX9/Solyc08g036570* gene; (E)  
682 *SITGA9/Solyc06g074320* gene and (F) *SITGA10/Solyc10g078670* gene. Data  
683 correspond to three biological replicates  $\pm$  SD. Statistical differences were inferred  
684 using a Mann-Whitney test. (\*) =  $p < 0.05$ , (\*\*) =  $p < 0.01$ , (\*\*\*) =  $p < 0.001$ .

685 **Figure 8.** Redox homeostasis is altered in *Sltpd1* mutant anthers. Quantification of  
686 superoxide anion ( $O_2^{\cdot-}$ ) levels (A) and  $H_2O_2$  levels (B) in wild-type and *Sltpd1* anthers  
687 at different developmental stages ( $n = 3 \pm$  SD). Quantification of superoxide dismutase  
688 (C) and peroxidase (D) activity in wild-type and *Sltpd1* flowers at different  
689 developmental stages (St6-St20). Data correspond to 3 biological replicates  $\pm$  SD.  
690 Statistical differences were inferred using a Mann-Whitney test. (\*) =  $p < 0.05$ , (\*\*) =  
691  $p < 0.01$ .

692 **Figure 9.** Working model summarizing the genetic elements of the redox network  
693 affected by the absence of *SITPDI* and the concomitant tapetum loss, at early stages of  
694 tomato anther development. Enzymatic ROS accumulation (Orange) is attenuated by  
695 ROS scavenging mechanism (Pink). Changes in ROS levels activate signalling  
696 pathways (Blue) that result in the induction of genes involved in anther/pollen  
697 development. APX: ascorbate peroxidase; GRXs: glutaredoxins; PRX: peroxidases;

698 RBOH: Respiratory burst oxidase homolog; SOD: superoxide dismutase; TGAs: TGA  
699 transcription factors.

700

## 701 REFERENCES

702 **Aguirre PJ, Smith AG** (1993) Molecular characterization of a gene encoding a  
703 cysteine-rich protein preferentially expressed in anthers of *Lycopersicon*  
704 *esculentum*. *Plant Mol Biol* **23**: 477–487

705 **Åstrand J, Knight C, Robson J, Talle B, Wilson ZA** (2021) Evolution and diversity  
706 of the angiosperm anther: trends in function and development. *Plant Reprod.* doi:  
707 10.1007/s00497-021-00416-1

708 **Aya K, Tanaka MU, Kondo M, Hamada K, Yano K, Nishimura M, Matsuoka M**  
709 (2009) Gibberellin modulates anther development in rice via the transcriptional  
710 regulation of GAMYB. *Plant Cell* **21**: 1453–1472

711 **Azumi Y, Liu D, Zhao D, Li W, Wang G, Hu Y, Ma H** (2002) Homolog interaction  
712 during meiotic prophase I in *Arabidopsis* requires the SOLO DANCERS gene  
713 encoding a novel cyclin-like protein. *EMBO J* **21**: 3081–3095

714 **Bai W, Wang P, Hong J, Kong W, Xiao Y, Yu X, Zheng H, You S, Lu J, Lei D, et**  
715 **al** (2019) Earlier degraded tapetum1 (EDT1) encodes an ATP-citrate lyase required  
716 for tapetum programmed cell death. *Plant Physiol* **181**: 1223–1238

717 **Van Bel M, Diels T, Vancaester E, Kreft L, Botzki A, Van De Peer Y, Coppens F,**  
718 **Vandepoele K** (2018) PLAZA 4.0: An integrative resource for functional,  
719 evolutionary and comparative plant genomics. *Nucleic Acids Res* **46**: D1190–  
720 D1196

721 **Bradford MM** (1976) A rapid and sensitive method for the quantitation of microgram  
722 quantities of protein utilizing the principle of protein-dye binding. *Anal Biochem*  
723 **72**: 248–254

724 **Brukhin V, Hernould M, Gonzalez N, Chevalier C, Mouras A** (2003) Flower  
725 development schedule in tomato *Lycopersicon esculentum* cv. sweet cherry. *Sex*  
726 *Plant Reprod* **15**: 311–320

- 727 **Canales C, Bhatt AM, Scott R, Dickinson H** (2002) EXS, a putative LRR receptor  
728 kinase, regulates male germline cell number and tapetal identity and promotes seed  
729 development in Arabidopsis. *Curr Biol* **12**: 1718–1727
- 730 **Chang F, Wang Y, Wang S, Ma H** (2011) Molecular control of microsporogenesis in  
731 Arabidopsis. *Curr Opin Plant Biol* **14**: 66–73
- 732 **Chen W, Lv M, Wang Y, Wang PA, Cui Y, Li M, Wang R, Gou X, Li J** (2019)  
733 BES1 is activated by EMS1-TPD1-SERK1/2-mediated signaling to control  
734 tapetum development in Arabidopsis thaliana. *Nat Commun*. doi: 10.1038/s41467-  
735 019-12118-4
- 736 **Clough SJ, Bent AF** (1998) Floral dip: a simplified method for Agrobacterium-  
737 mediated transformation of Arabidopsis thaliana. *Plant J* **16**: 735–743
- 738 **Cui J, You C, Zhu E, Huang Q, Ma H, Chang F** (2016) Feedback regulation of  
739 DYT1 by interactions with downstream bHLH factors promotes DYT1 Nuclear  
740 localization and anther development. *Plant Cell* **28**: 1078–1093
- 741 **Dukowic-Schulze S, van der Linde K** (2021) Oxygen, secreted proteins and small  
742 RNAs: mobile elements that govern anther development. *Plant Reprod*. doi:  
743 10.1007/s00497-020-00401-0
- 744 **Earley KW, Haag JR, Pontes O, Opper K, Juehne T, Song K, Pikaard CS** (2006)  
745 Gateway-compatible vectors for plant functional genomics and proteomics. *Plant J*  
746 **45**: 616–629
- 747 **Ellul P, Garcia-Sogo B, Pineda B, Ríos G, Roig LA, Moreno V** (2003) The ploidy  
748 level of transgenic plants in Agrobacterium-mediated transformation of tomato  
749 cotyledons (*Lycopersicon esculentum* L.Mili.) is genotype and procedure  
750 dependent. *Theor Appl Genet* **106**: 231–238
- 751 **Gómez-Mena C, Roque EM** (2018) Non-isotopic RNA in situ hybridization for  
752 functional analyses in *Medicago truncatula*. *Methods Mol Biol*. doi: 10.1007/978-  
753 1-4939-8633-0\_10
- 754 **Gómez JF, Talle B, Wilson ZA** (2015) Anther and pollen development: A conserved  
755 developmental pathway. *J Integr Plant Biol* **57**: 876–891
- 756 **Goodstein DM, Shu S, Howson R, Neupane R, Hayes RD, Fazo J, Mitros T, Dirks**

- 757 **W, Hellsten U, Putnam N, et al** (2012) Phytozome: A comparative platform for  
758 green plant genomics. *Nucleic Acids Res* **40**: 1178–1186
- 759 **Gorman SW, McCormick S** (1997) Male Sterility in Tomato. *CRC Crit Rev Plant Sci*  
760 **16**: 31–53
- 761 **Gu JN, Zhu J, Yu Y, Teng XD, Lou Y, Xu XF, Liu JL, Yang ZN** (2014) DYT1  
762 directly regulates the expression of TDF1 for tapetum development and pollen wall  
763 formation in Arabidopsis. *Plant J* **80**: 1005–1013
- 764 **Hao S, Ariizumi T, Ezura H** (2017) Sexual sterility is essential for both male and  
765 female gametogenesis in tomato. *Plant Cell Physiol* **58**: 22–34
- 766 **Hong L, Tang D, Shen Y, Hu Q, Wang K, Li M, Lu T, Cheng Z** (2012a) MIL2  
767 (MICROSPORELESS2) regulates early cell differentiation in the rice anther. *New*  
768 *Phytol* **196**: 402–413
- 769 **Hong L, Tang D, Zhu K, Wang K, Li M, Cheng Z** (2012b) Somatic and reproductive  
770 cell development in rice anther is regulated by a putative glutaredoxin. *Plant Cell*  
771 **24**: 577–588
- 772 **Huang H, Ullah F, Zhou DX, Yi M, Zhao Y** (2019) Mechanisms of ROS regulation of  
773 plant development and stress responses. *Front Plant Sci* **10**: 1–10
- 774 **Huang J, Wijeratne AJ, Tang C, Zhang T, Fenelon RE, Owen HA, Zhao D** (2016a)  
775 Ectopic expression of TAPETUM DETERMINANT1 affects ovule development  
776 in Arabidopsis. *J Exp Bot* **67**: 1311–1326
- 777 **Huang J, Zhang T, Linstroth L, Tillman Z, Otegui MS, Owen HA, Zhao D** (2016b)  
778 Control of Anther Cell Differentiation by the Small Protein Ligand TPD1 and Its  
779 Receptor EMS1 in Arabidopsis. *PLoS Genet* **12**: 1–29
- 780 **Huijser P, Klein J, Lönig WE, Meijer H, Saedler H, Sommer H** (1992)  
781 Bracteomania, an inflorescence anomaly, is caused by the loss of function of the  
782 MADS-box gene squamosa in *Antirrhinum majus*. *EMBO J* **11**: 1239–1249
- 783 **Ito T, Shinozaki K** (2002) The MALE STERILITY1 gene of Arabidopsis, encoding a  
784 nuclear protein with a PHD-finger motif, is expressed in tapetal cells and is  
785 required for pollen maturation. *Plant Cell Physiol*. doi: 10.1093/pcp/pcf154

- 786 **Jacobowitz JR, Doyle WC, Weng JK** (2019) PRX9 and PRX40 are extensin  
787 peroxidases essential for maintaining tapetum and microspore cell wall integrity  
788 during arabidopsis anther development. *Plant Cell* **31**: 848–861
- 789 **Jaffri SRF, MacAlister CA** (2021) Sequential Deposition and Remodeling of Cell  
790 Wall Polymers During Tomato Pollen Development. *Front Plant Sci.* doi:  
791 10.3389/fpls.2021.703713
- 792 **Jeong HJ, Kang JH, Zhao M, Kwon JK, Choi HS, Bae JH, Lee HA, Joung YH,**  
793 **Choi D, Kang BC** (2014) Tomato Male sterile 1035 is essential for pollen  
794 development and meiosis in anthers. *J Exp Bot* **65**: 6693–6709
- 795 **Kelliher T, Walbot V** (2012) Hypoxia triggers meiotic fate acquisition in maize.  
796 *Science* (80- ) **337**: 345–348
- 797 **Konieczny A, Ausubel FM** (1993) A procedure for mapping Arabidopsis mutations  
798 using co-dominant ecotype-specific PCR-based markers. *Plant J* **4**: 403–410
- 799 **Kotchoni SO, Kuhns C, Ditzer A, Kirch HH, Bartels D** (2006) Over-expression of  
800 different aldehyde dehydrogenase genes in Arabidopsis thaliana confers tolerance  
801 to abiotic stress and protects plants against lipid peroxidation and oxidative stress.  
802 *Plant, Cell Environ* **29**: 1033–1048
- 803 **Labroo MR, Studer AJ, Rutkoski JE** (2021) Heterosis and Hybrid Crop Breeding: A  
804 Multidisciplinary Review. *Front Genet* **12**: 1–19
- 805 **Lei X, Liu B** (2020) Tapetum-Dependent Male Meiosis Progression in Plants:  
806 Increasing Evidence Emerges. *Front Plant Sci* **10**: 1–10
- 807 **van der Linde K, Walbot V** (2019) Pre-meiotic anther development, 1st ed. *Curr Top*  
808 *Dev Biol.* doi: 10.1016/bs.ctdb.2018.11.001
- 809 **Liu X, Yang M, Liu X, Wei K, Cao X, Wang X, Wang X, Guo Y, Du Y, Li J, et al**  
810 (2019) A putative bHLH transcription factor is a candidate gene for male sterile 32,  
811 a locus affecting pollen and tapetum development in tomato. *Hortic Res.* doi:  
812 10.1038/s41438-019-0170-2
- 813 **Liu Z, Shi X, Li S, Hu G, Zhang L, Song X** (2018) Tapetal-delayed programmed cell  
814 death (PCD) and oxidative stress-induced male sterility of *aegilops uniaristata*  
815 cytoplasm in wheat. *Int J Mol Sci.* doi: 10.3390/ijms19061708

- 816 **Medina M, Roque E, Pineda B, Cañas L, Rodríguez-Concepción M, Beltrán JP,**  
817 **Gómez-Mena C** (2013) Early anther ablation triggers parthenocarpic fruit  
818 development in tomato. *Plant Biotechnol J* **11**: 770–779
- 819 **Millar AA, Gubler F** (2005) The Arabidopsis GAMYB-like Genes, MYB33 and  
820 MYB65, are microRNA-regulated genes that redundantly facilitate anther  
821 development. *Plant Cell* **17**: 705–721
- 822 **Mittler R** (2017) ROS Are Good. *Trends Plant Sci* **22**: 11–19
- 823 **Molesini B, Dusi V, Pennisi F, Pandolfini T** (2020) How hormones and mads-box  
824 transcription factors are involved in controlling fruit set and parthenocarpy in  
825 tomato. *Genes (Basel)* **11**: 1–17
- 826 **Murmu J, Bush MJ, de Long C, Li S, Xu M, Khan M, Malcolmson C, Fobert PR,**  
827 **Zachgo S, Hepworth SR** (2010) Arabidopsis basic leucine-zipper transcription  
828 factors TGA9 and TGA10 interact with floral glutaredoxins ROXY1 and ROXY2  
829 and are redundantly required for anther development. *Plant Physiol* **154**: 1492–  
830 1504
- 831 **Nonomura K-I, Miyoshi K, Eiguchi M, Suzuki T, Miyao A, Hirochika H, Kurata N**  
832 (2003) The MSP1 Gene Is Necessary to Restrict the Number of Cells Entering into  
833 Male and Female Sporogenesis and to Initiate Anther Wall Formation in Rice  
834 Published by : American Society of Plant Biologists ( ASPB ) Linked references  
835 are available on JSTOR for t. *Plant Cell* **15**: 1728–1739
- 836 **O'Brien TP, Feder N, McCully ME** (1964) Polychromatic staining of plant cell walls  
837 by toluidine blue O. *Protoplasma* **59**: 368–373
- 838 **Okabe Y, Yamaoka T, Ariizumi T, Ushijima K, Kojima M, Takebayashi Y,**  
839 **Sakakibara H, Kusano M, Shinozaki Y, Pulungan SI, et al** (2019) Aberrant  
840 Stamen Development is Associated with Parthenocarpic Fruit Set Through Up-  
841 Regulation of Gibberellin Biosynthesis in Tomato. *Plant Cell Physiol*. doi:  
842 10.1093/pcp/pcy184
- 843 **Oliveros JC, Franch M, Tabas-Madrid D, San-León D, Montoliu L, Cubas P,**  
844 **Pazos F** (2016) Breaking-Cas-interactive design of guide RNAs for CRISPR-Cas  
845 experiments for ENSEMBL genomes. *Nucleic Acids Res* **44**: W267–W271



- 846 **Pacini E, Cresti M** (1978) Ultrastructural characteristics of the tapetum and  
847 microspore mother cells in *Lycopersicon peruvianum* during meiotic prophase .  
848 *Bull la Société Bot Fr Actual Bot* **125**: 121–128
- 849 **Peterson R, Slovin JP, Chen C** (2010) A simplified method for differential staining of  
850 aborted and non-aborted pollen grains. *Int J Plant Biol* **1**: 66–69
- 851 **Rhee SY, Osborne E, Poindexter PD, Somerville CR** (2003) Microspore Separation  
852 in the quartet 3 Mutants of *Arabidopsis* Is Impaired by a Defect in a  
853 Developmentally Regulated Polygalacturonase Required for Pollen Mother Cell  
854 Wall Degradation. *Plant Physiol* **133**: 1170–1180
- 855 **Rojas-Gracia P, Roque E, Medina M, Rochina M, Hamza R, Angarita-Díaz MP,**  
856 **Moreno V, Pérez-Martín F, Lozano R, Cañas L, et al** (2017) The  
857 parthenocarpic hydra mutant reveals a new function for a SPOROCTELESS-like  
858 gene in the control of fruit set in tomato. *New Phytol* **214**: 1198–1212
- 859 **Sagi M, Davydov O, Orazova S, Yesbergenova Z, Ophir R, Stratmann JW, Fluhr**  
860 **R** (2004) Plant respiratory burst oxidase homologs impinge on wound  
861 responsiveness and development in *Lycopersicon esculentum*. *Plant Cell* **16**: 616–  
862 628
- 863 **Sheridan WF, Avalkina NA, Shamrov II, Batygina TB, Golubovskaya IN** (1996)  
864 The *mac1* gene: Controlling the commitment to the meiotic pathway in maize.  
865 *Genetics* **142**: 1009–1020
- 866 **Song JJ, Rhee JG, Suntharalingam M, Walsh SA, Spitz DR, Lee YJ** (2002) Role of  
867 glutaredoxin in metabolic oxidative stress: Glutaredoxin as a sensor of oxidative  
868 stress mediated by H<sub>2</sub>O<sub>2</sub>. *J Biol Chem* **277**: 46566–46575
- 869 **Sorensen AM, Kröber S, Unte US, Huijser P, Dekker K, Saedler H** (2003) The  
870 *Arabidopsis* ABORTED MICROSPORES (AMS) gene encodes a MYC class  
871 transcription factor. *Plant J* **33**: 413–423
- 872 **Tamura K, Stecher G, Peterson D, Filipowski A, Kumar S** (2013) MEGA6: Molecular  
873 evolutionary genetics analysis version 6.0. *Mol Biol Evol* **30**: 2725–2729
- 874 **Unger C, Kleta S, Jandl G, Tiedemann A V.** (2005) Suppression of the defence-  
875 related oxidative burst in bean leaf tissue and bean suspension cells by the

- 876 necrotrophic pathogen *Botrytis cinerea*. *J Phytopathol* **153**: 15–26
- 877 **Vivian-Smith A, Koltunow AM** (1999) Genetic analysis of growth-regulator-induced  
878 parthenocarpy in *Arabidopsis*. *Plant Physiol.* doi: 10.1104/pp.121.2.437
- 879 **Wang CJR, Nan GL, Kelliher T, Timofejeva L, Vernoud V, Golubovskaya IN,**  
880 **Harper L, Egger R, Walbot V, Zacheus Cande W** (2012) Maize multiple  
881 archesporial cells 1 (*mac1*), an ortholog of rice *TDL1A*, modulates cell  
882 proliferation and identity in early anther development. *Dev* **139**: 2594–2603
- 883 **Wilson ZA, Zhang DB** (2009) From *Arabidopsis* to rice: Pathways in pollen  
884 development. *J Exp Bot* **60**: 1479–1492
- 885 **Xie HT, Wan ZY, Li S, Zhang Y** (2014) Spatiotemporal production of reactive oxygen  
886 species by nadph oxidase is critical for tapetal programmed cell death and pollen  
887 development in *Arabidopsis*. *Plant Cell* **26**: 2007–2023
- 888 **Xing S, Zachgo S** (2008) *ROXY1* and *ROXY2*, two *Arabidopsis* glutaredoxin genes,  
889 are required for anther development. *Plant J* **53**: 790–801
- 890 **Yan MY, Xie DL, Cao JJ, Xia XJ, Shi K, Zhou YH, Zhou J, Foyer CH, Yu JQ**  
891 (2020) Brassinosteroid-mediated reactive oxygen species are essential for tapetum  
892 degradation and pollen fertility in tomato. *Plant J* **102**: 931–947
- 893 **Yang S-L, Xie L-F, Mao H-Z, Pua CS, Yang W-C, Jiang L, Sundaresan V, Ye D**  
894 (2003) *TAPETUM DETERMINANT1* Is Required for Cell Specialization in the  
895 *Arabidopsis* Anther. *Plant Cell* **15**: 2792 LP – 2804
- 896 **Yang SL, Jiang L, Pua CS, Xie LF, Zhang XQ, Chen LQ, Yang WC, Ye D** (2005)  
897 Overexpression of *TAPETUM DETERMINANT1* alters the cell fates in the  
898 *Arabidopsis* carpel and tapetum via genetic interaction with *EXCESS*  
899 *MICROSPOROCTES1/EXTRA SPOROGENOUS CELLS*. *Plant Physiol* **139**:  
900 186–191
- 901 **Yang X, Li G, Tian Y, Song Y, Liang W, Zhang D** (2018) A rice glutamyl-tRNA  
902 synthetase modulates early anther cell division and patterning. *Plant Physiol* **177**:  
903 728–744
- 904 **Yu J, Zhang D** (2019) Molecular Control of Redox Homeostasis in Specifying the  
905 Cell Identity of Tapetal and Microsporocyte Cells in Rice. *Rice*. doi:

- 906 10.1186/s12284-019-0300-3
- 907 **Zhang D, Yang L** (2014) Specification of tapetum and microsporocyte cells within the  
908 anther. *Curr Opin Plant Biol* **17**: 49–55
- 909 **Zhao DZ, Wang GF, Speal B, Ma H** (2002) The EXCESS MICROSPOROCYTES1  
910 gene encodes a putative leucine-rich repeat receptor protein kinase that controls  
911 somatic and reproductive cell fates in the Arabidopsis anther. *Genes Dev* **16**:  
912 2021–2031
- 913 **Zhao X, De Palma J, Oane R, Gamuyao R, Luo M, Chaudhury A, Hervé P, Xue Q,**  
914 **Bennett J** (2008) OsTDL1A binds to the LRR domain of rice receptor kinase  
915 MSP1, and is required to limit sporocyte numbers. *Plant J* **54**: 375–387
- 916 **Zhu J, Chen H, Li H, Gao JF, Jiang H, Wang C, Guan YF, Yang ZN** (2008)  
917 Defective in Tapetal Development and Function 1 is essential for anther  
918 development and tapetal function for microspore maturation in Arabidopsis. *Plant J*  
919 **55**: 266–277
- 920

**Figure 1.** *Solyc03g097530* (*SITPD1*) encodes the ortholog of *TPD1* in tomato. A, Unrooted neighbor-joining tree of *TPD1*-like proteins. The numbers next to the internal nodes are bootstrap values from 1000 pseudo-replicates. B, Amino acid sequence alignment between the Arabidopsis and tomato gene homologs. The putative signal peptides are underlined, the six conserved cysteine residues are in bold and the potential dibasic cleavage site is highlighted with a red square. C, Subcellular localization of *SITPD1* protein in *Nicotiana benthamiana* leaves as observed by confocal microscopy. D, Complementation of the male sterile floral phenotype of the Arabidopsis *tpd1* mutant using *SITPD1* gene. All the *tpd1*; *pTPD1*:*SITPD1* plants showed viable pollen. Scale bars in (D) correspond to 500  $\mu$ m.

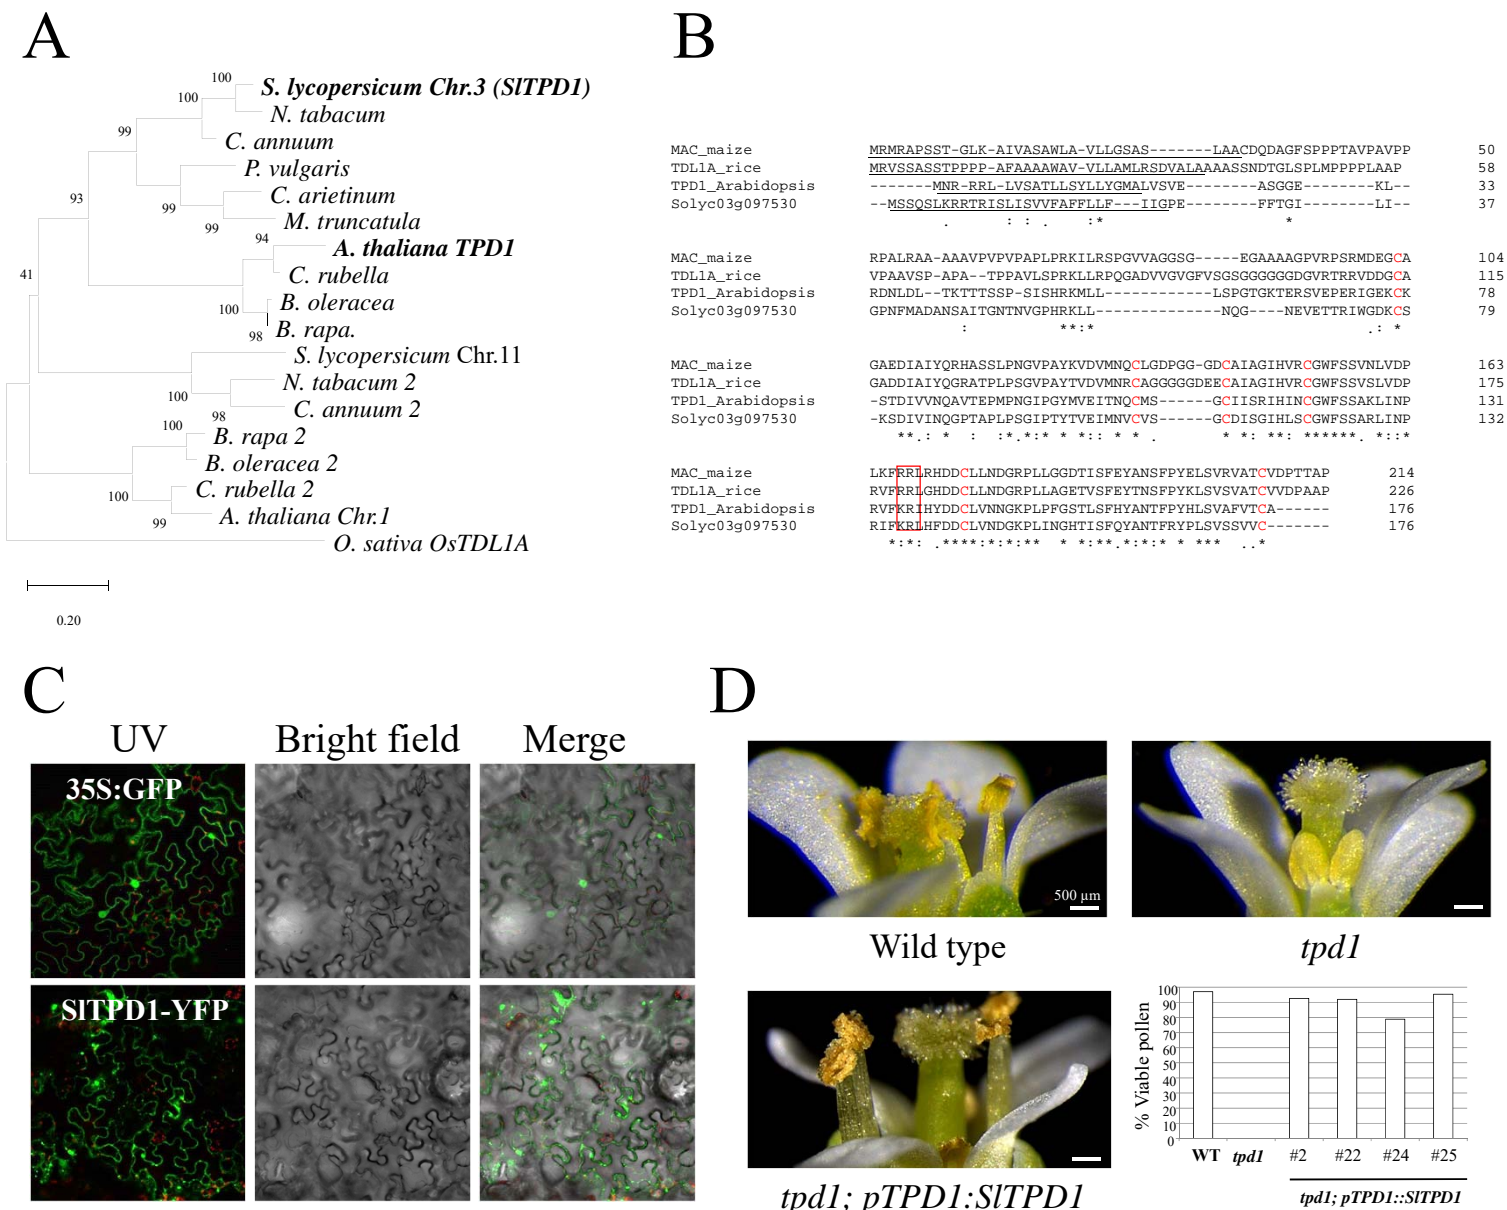



**Figure 2.** Expression of *SITPD1* during plant development. A, Relative expression of *SITPD1* in different plant tissues analysed by qPCR. Data were normalized to the expression of *ACT10* gene and correspond to the mean ( $\pm$ SD) of three biological replicates. B-G, Localization of *SITPD1* transcript by *in situ* hybridization on reproductive meristems and developing flowers. St6: floral stage 6; St8: floral stage 8; St10: floral stage 10; St12: floral stage 12; St14: floral stage 14. SC: Sporogenous cells; MT: microspore tetrads; T: Tapetum; Mp: microspores; P: mature pollen.

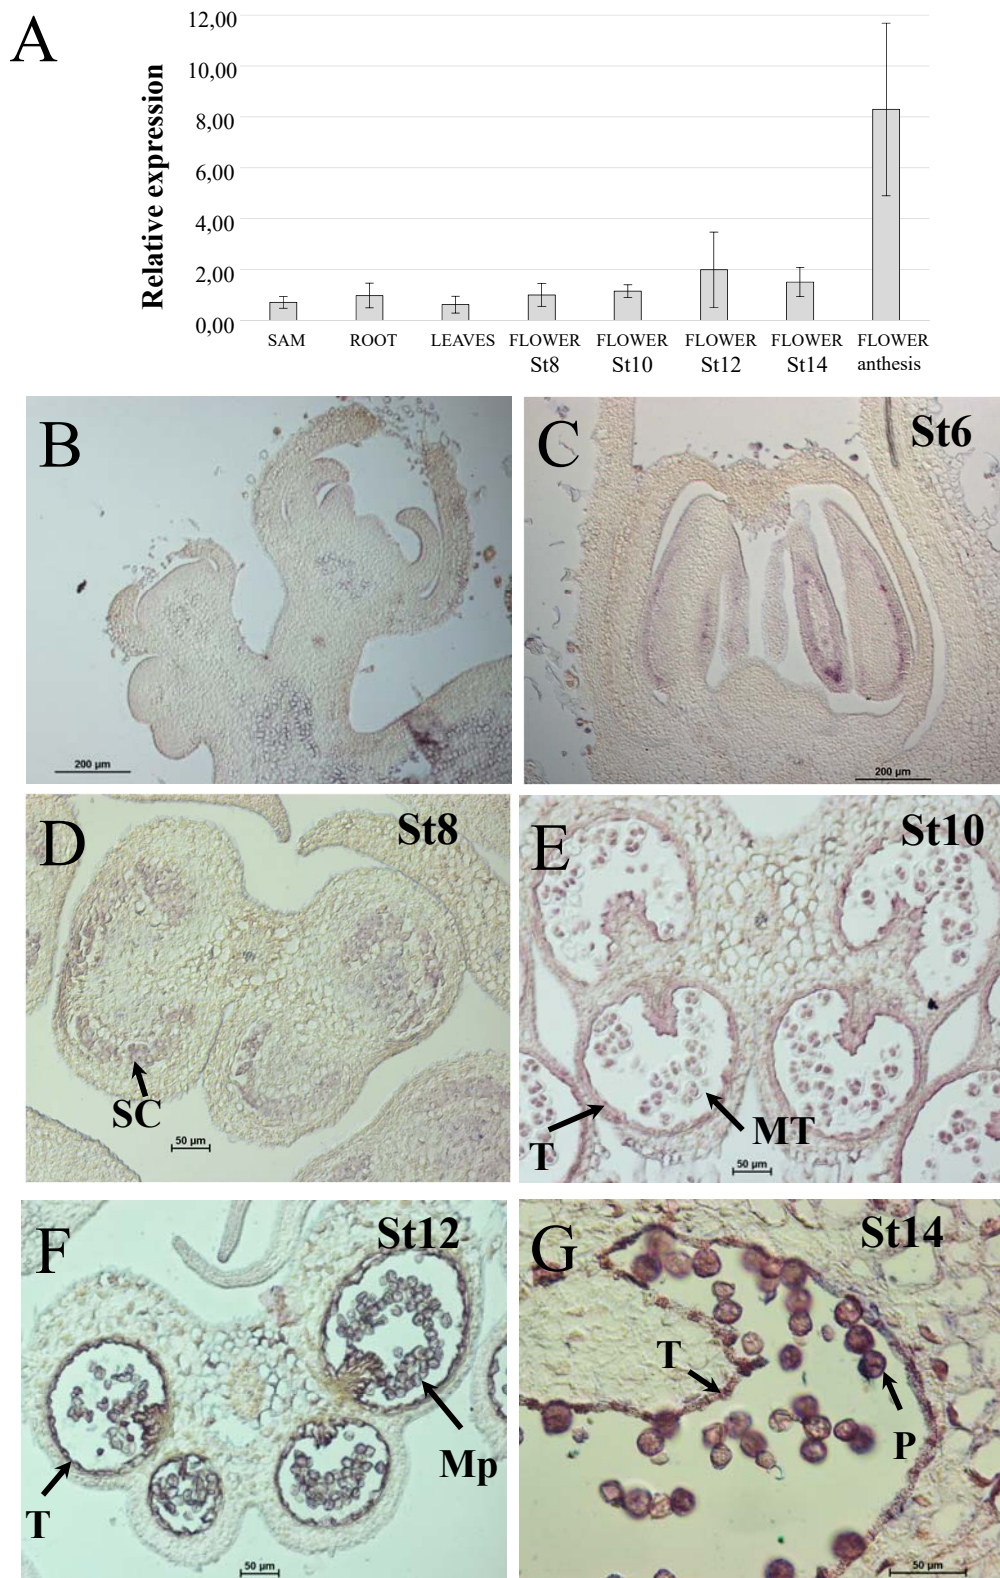

**Figure 3.** Mutations in *SlTPD1* result in empty anthers and seedless fruits. A, Guide RNA (in blue) was targeted to the third exon of *SlTPD1*. B, Wild-type and *Sltpd1* flowers and opened fruits. *Sltpd1* plants showed flowers with protruding pistils (arrow) and seedless fruits. Scale bar: 0.5 cm. C, Fruit weight and shape (width/height ration) of the wild type, *Sltpd1*<sup>Del5</sup> and *Sltpd1*<sup>Del2</sup> plants (n ≥ 40 ± SD).

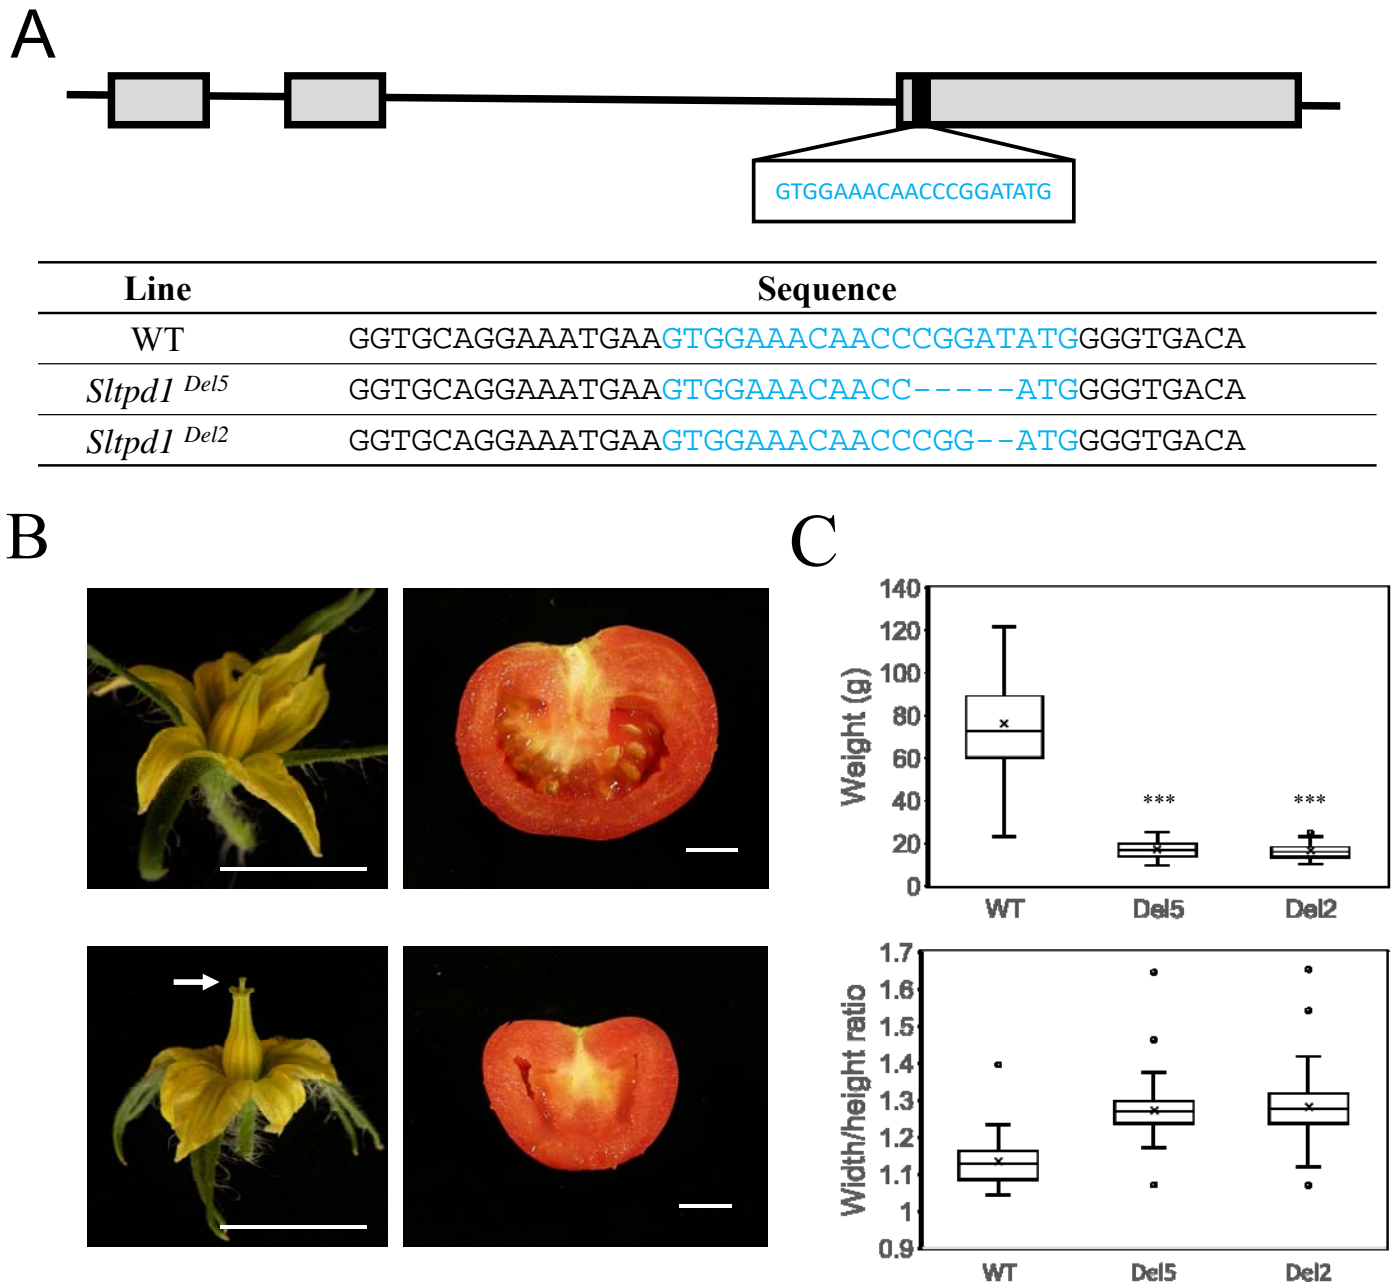



**Figure 4.** Pollen development is impaired in *Sltpd1* mutants. A-L, Histological sections of anther from the wild type (a-c and g-i) and *Sltpd1* mutant (D-F and J-L) at different developmental stages. Transversal section of anthers from floral stage 6 (A) and (D), floral stage 8 (B) and (E), floral stage 10 (C) and (F), floral stage 12 (G) and (J), floral stage 14 (H) and (K) and floral stage 16 (I and L). Floral stages have been named according to Brukhin et al 2003. Scale bar: 50  $\mu$ m. Ep: epidermis; En: endotecium; ML: middle layers; SC: sporogenous cells; T: tapetum; Td: tetrads; Mp: microspores; P: mature pollen.

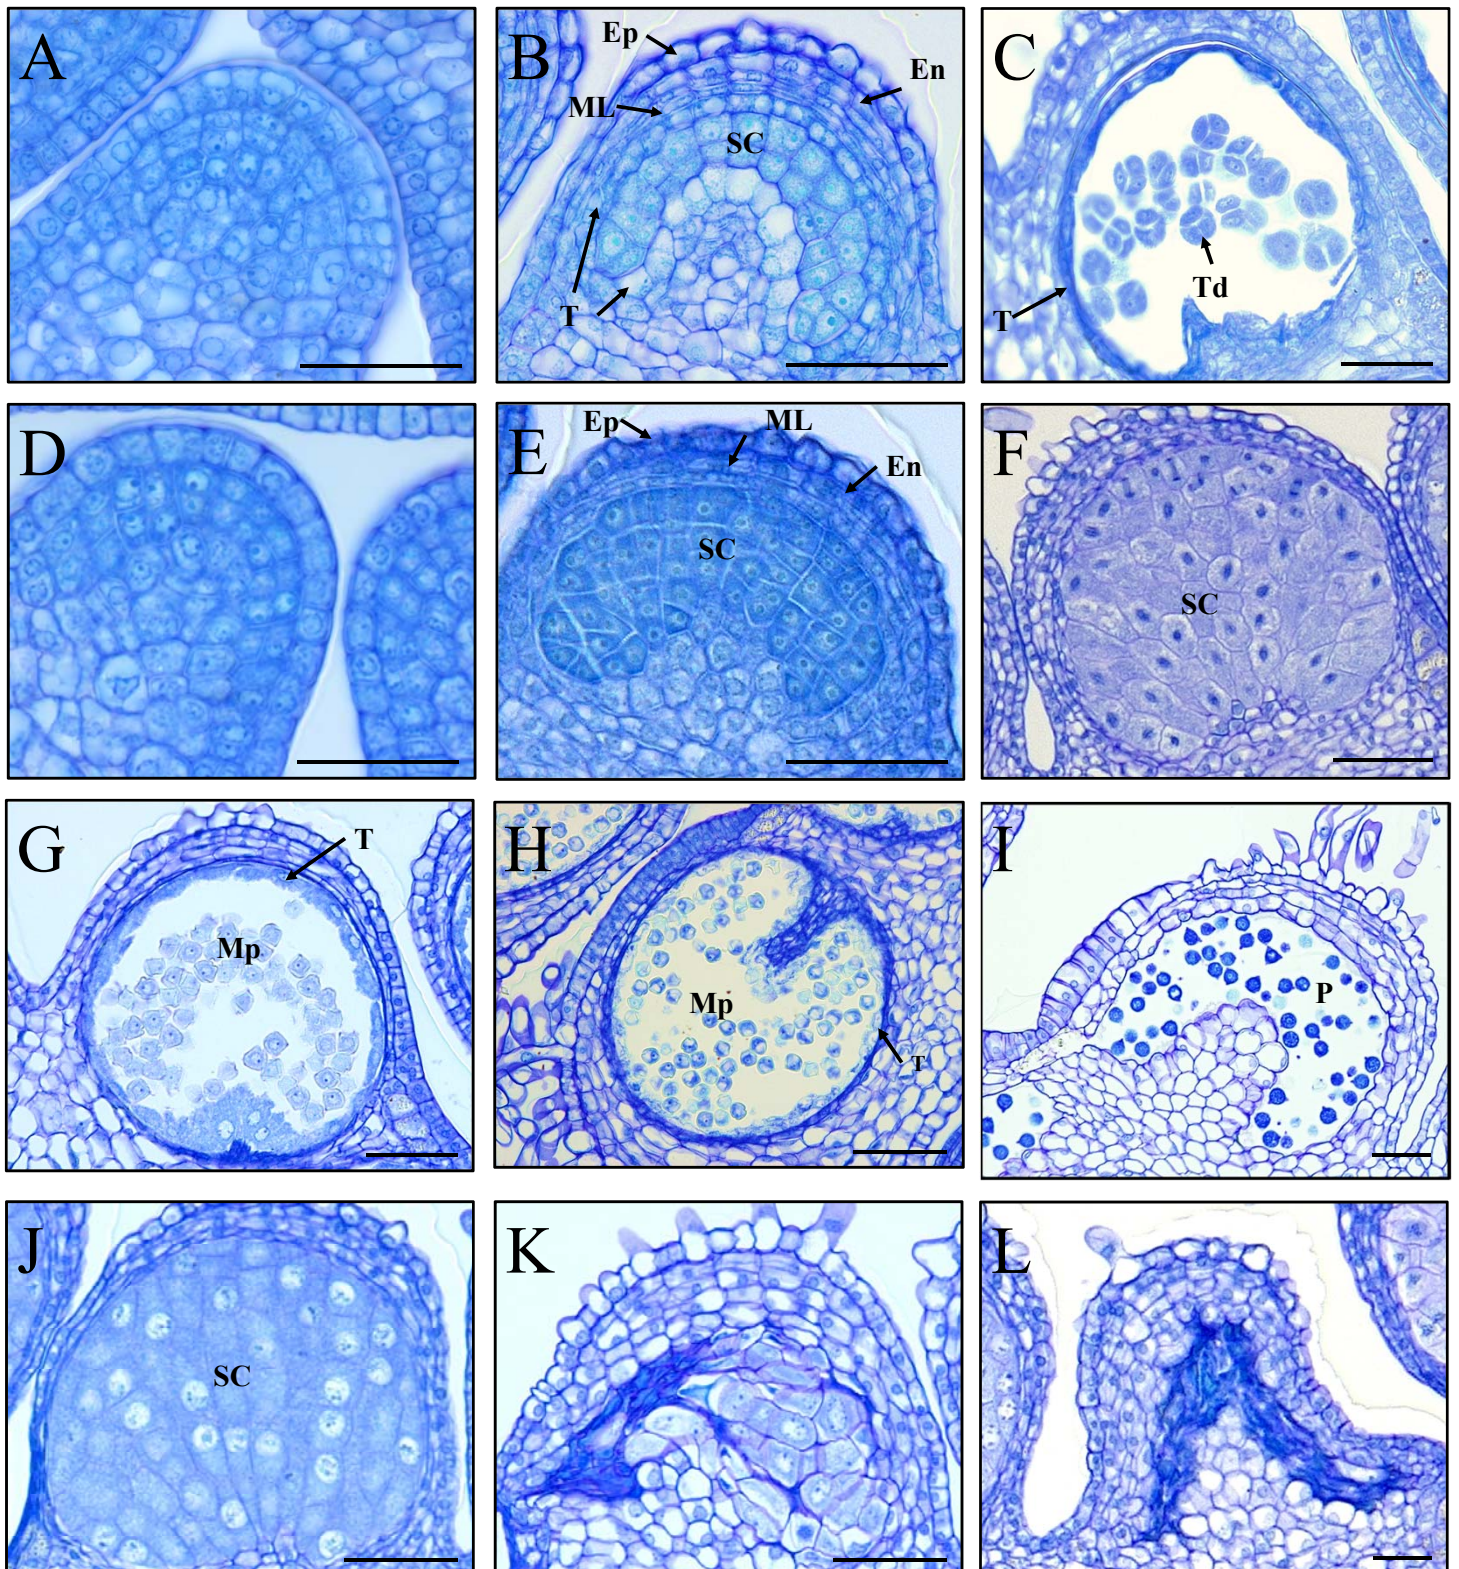



**Figure 5.** *Sltpd1* mutant anthers specifically lack tapetal cells. A, *In situ* hybridization of the tapetum marker *TomA5B* in wild type and *Sltpd1* anthers. B, *In situ* hybridization of the meiosis marker *SlSDS* in wild type and *Sltpd1* anthers at floral stage 8. C, Callose deposition in anthers as observed by aniline blue staining of wild type and *Sltpd1*. St8: floral stage 8; St10: floral stage 10; St12: floral stage 12. Scale bar: 50  $\mu\text{m}$  in (A) and (B); 100  $\mu\text{m}$  in (C).

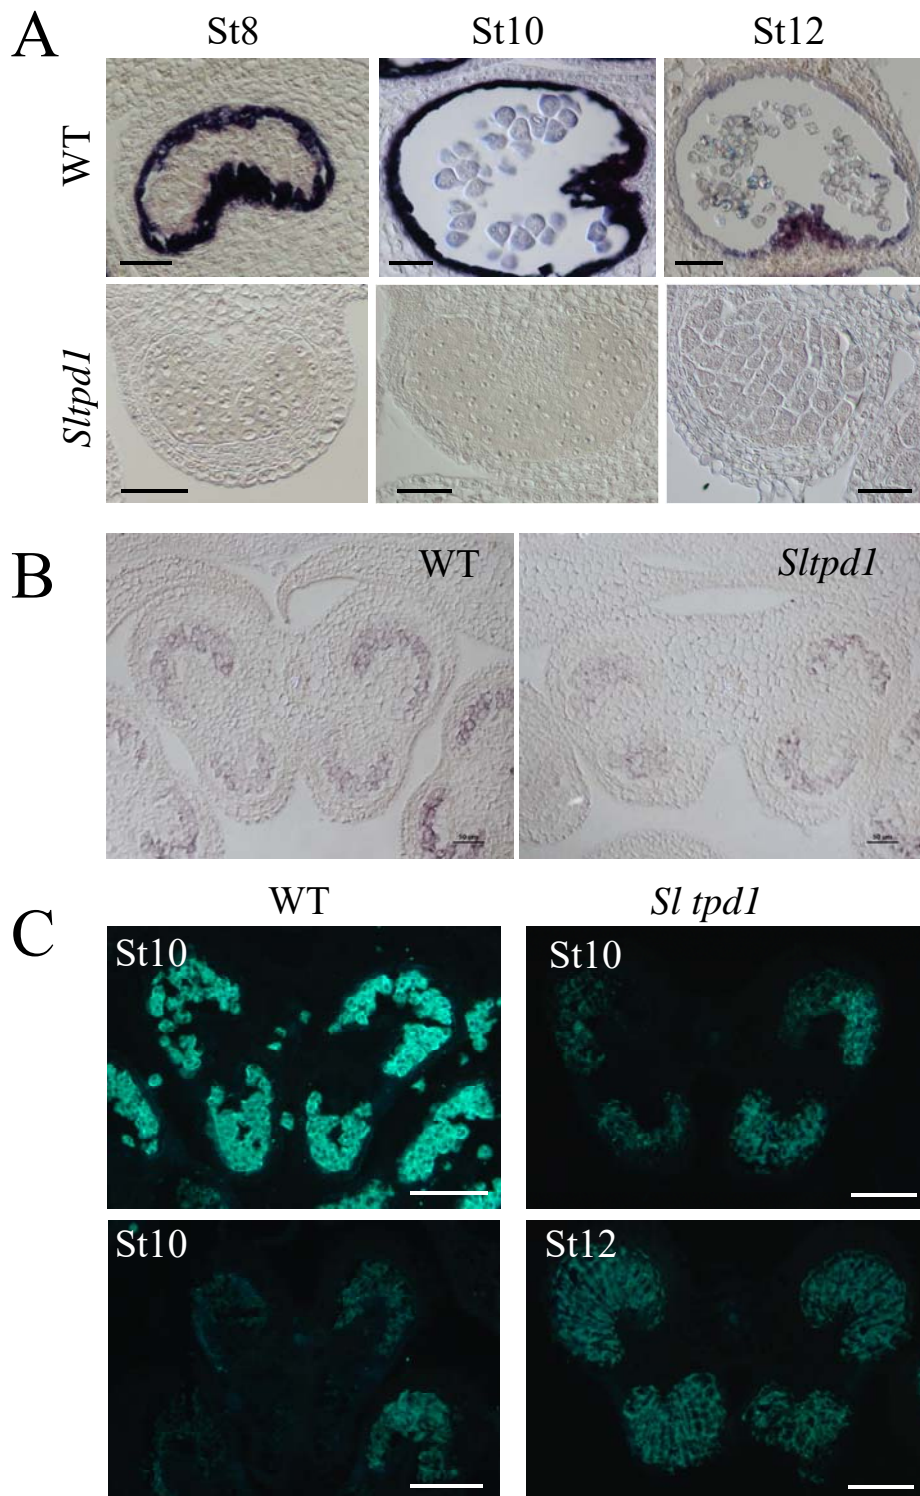

**Figure 6.** Global gene expression changes in the anthers of *Sltpd1* mutants at floral stage 8 in comparison with the wild type. A, Total number of DEGs between wild type and mutant anthers. B, GO biological process enrichment analysis. C, Expression heatmap of differentially expressed genes involved in pollen and anther development. D, Expression heatmap of differentially expressed ROS-related genes. Q-value < 0.05; p-value < 0.05.

A

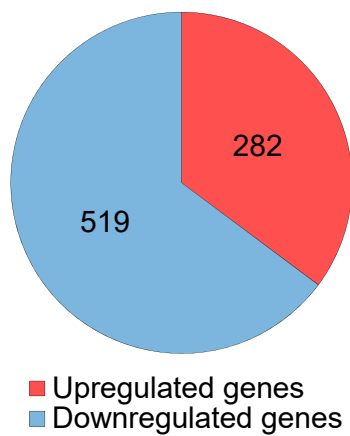

B

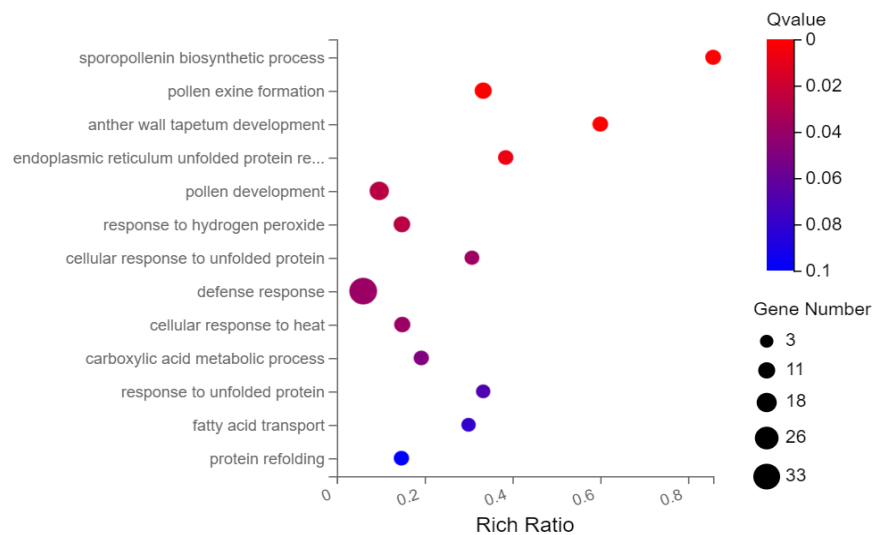

C

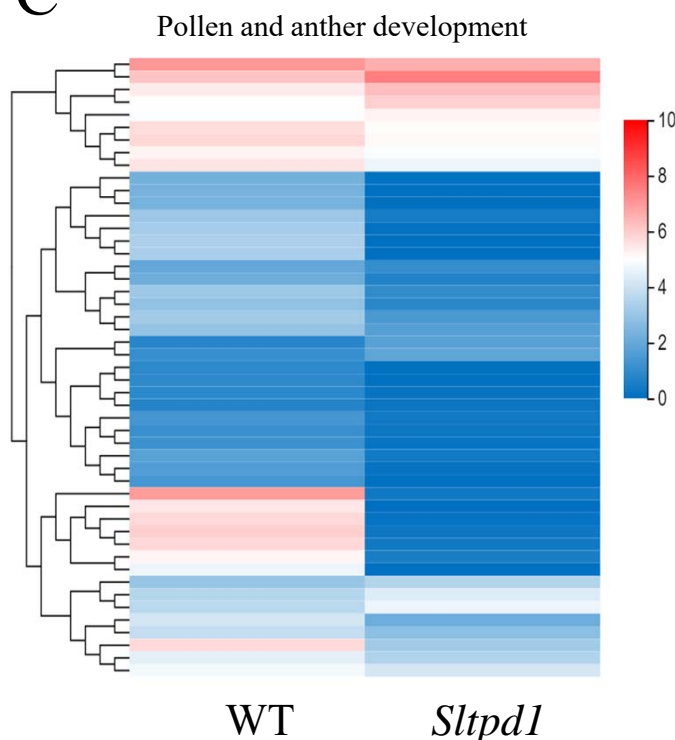

D

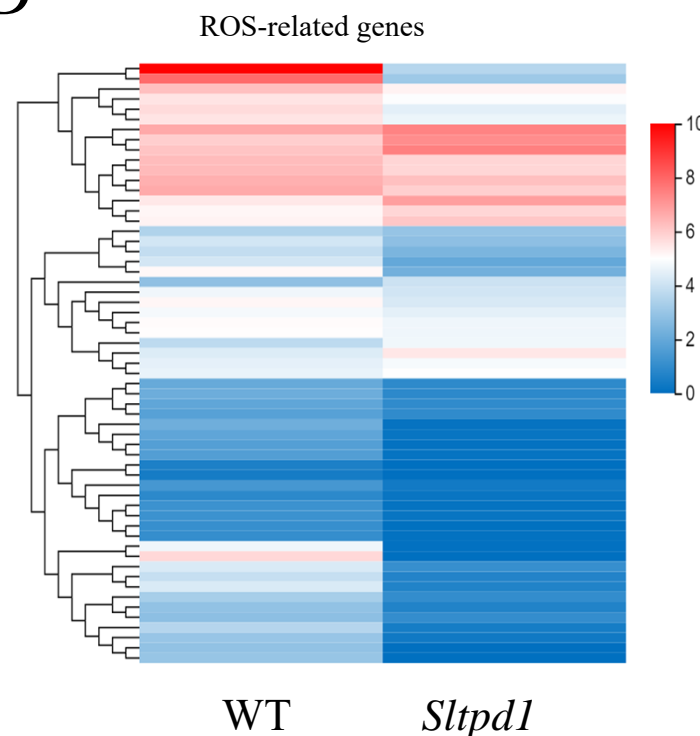

**Figure 7.** Expression pattern of genes involved in redox homeostasis during anther development of the wild type and *Sltpd1* mutant plants. Quantitative RT-PCR of (A) *SIRbohA/Solyc01g099620* gene; (B) *SIRbohE/Solyc06g075570* gene; (C) *RBOH1/SIRbohG/Solyc08g081690* gene; (D) *SIGRX9/Solyc08g036570* gene; (E) *SITGA9/Solyc06g074320* gene and (F) *SITGA10/Solyc10g078670* gene. Data correspond to three biological replicates  $\pm$  SD. Statistical differences were inferred using a Mann-Whitney test. (\*) =  $p < 0.05$ , (\*\*) =  $p < 0.01$ , (\*\*\*) =  $p < 0.001$ .

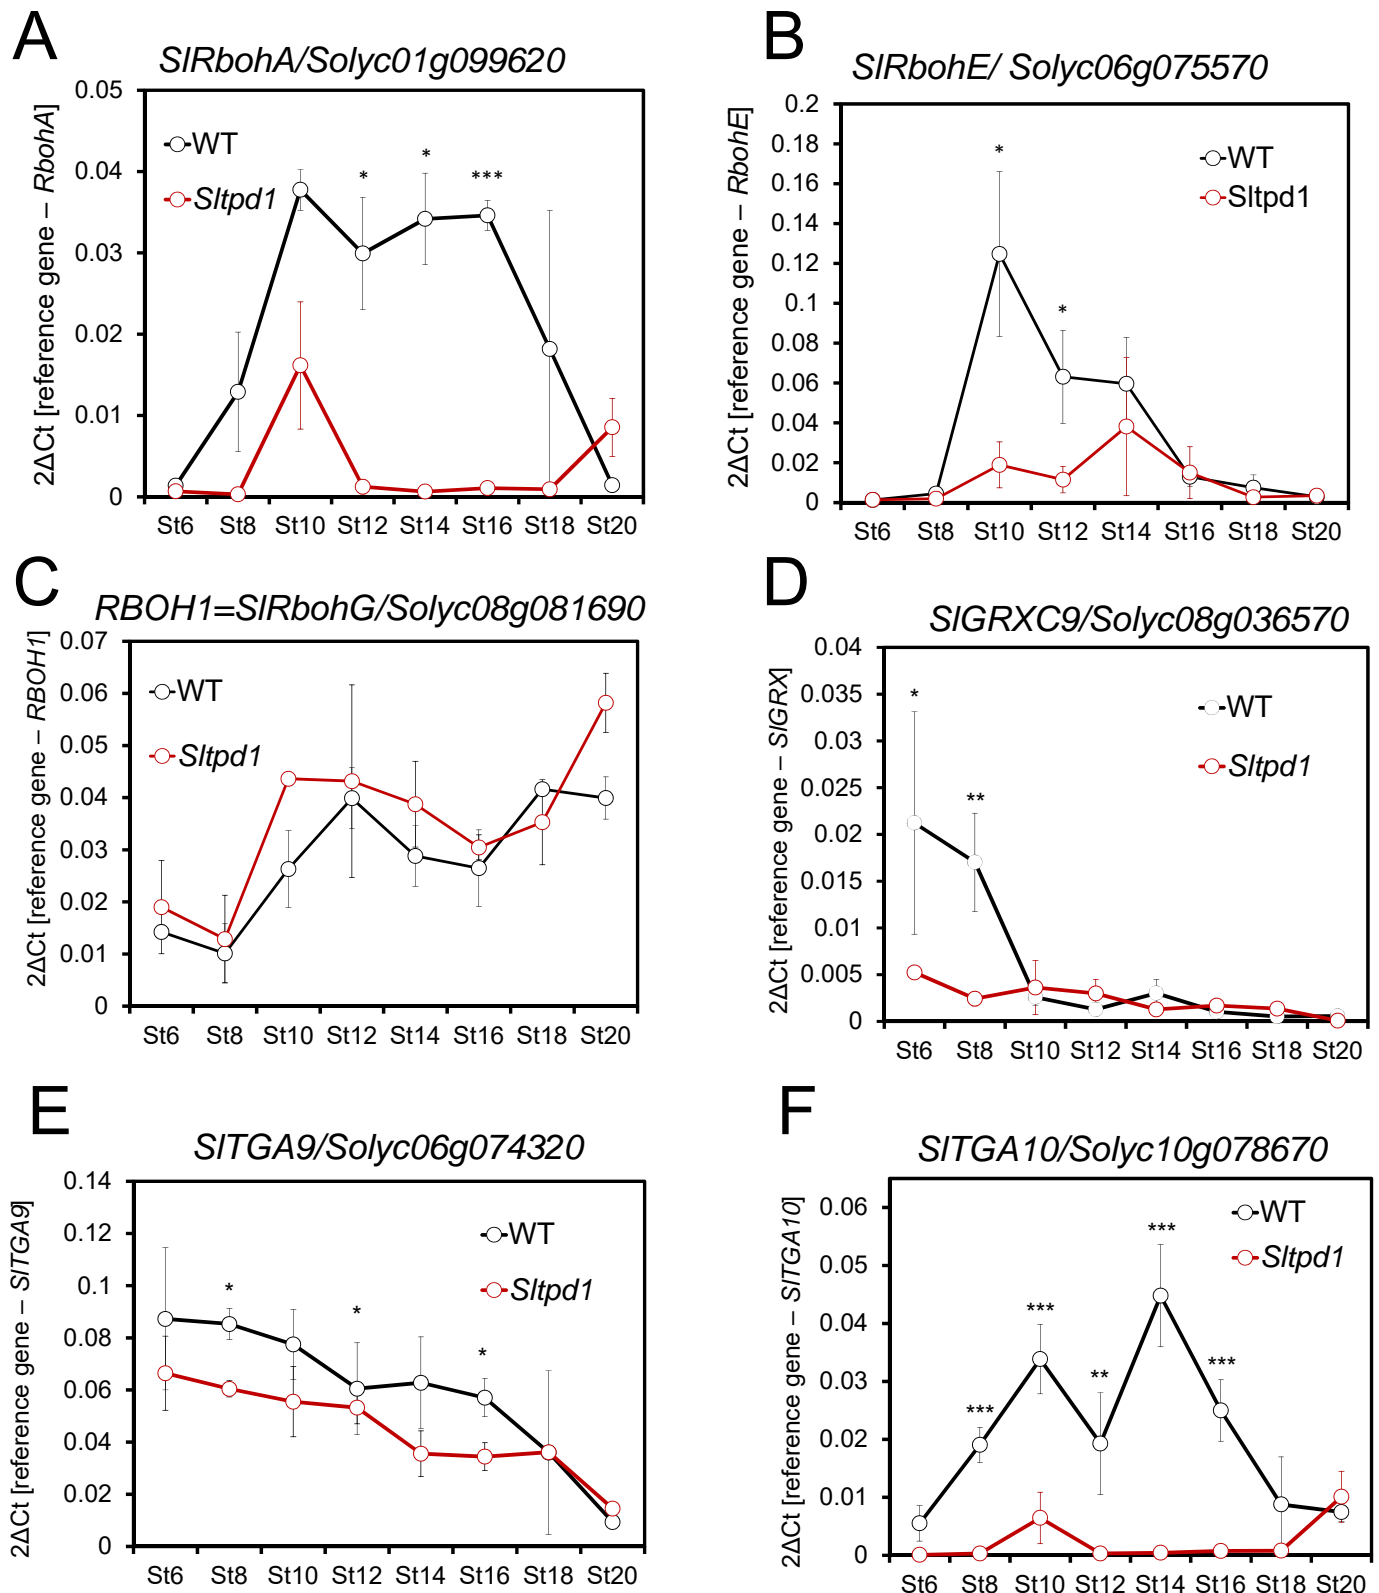

**Figure 8.** Redox homeostasis is altered in *Sltpd1* mutant anthers. Quantification of superoxide anion ( $O_2^{\cdot-}$ ) levels (A) and  $H_2O_2$  levels (B) in wild-type and *Sltpd1* anthers at different developmental stages ( $n = 3 \pm SD$ ). Quantification of superoxide dismutase (C) and peroxidase (D) activity in wild-type and *Sltpd1* flowers at different developmental stages (St6-St20). Data correspond to 3 biological replicates  $\pm$  SD. Statistical differences were inferred using a Mann-Whitney test. (\*) =  $p < 0.05$ , (\*\*) =  $p < 0.01$ .

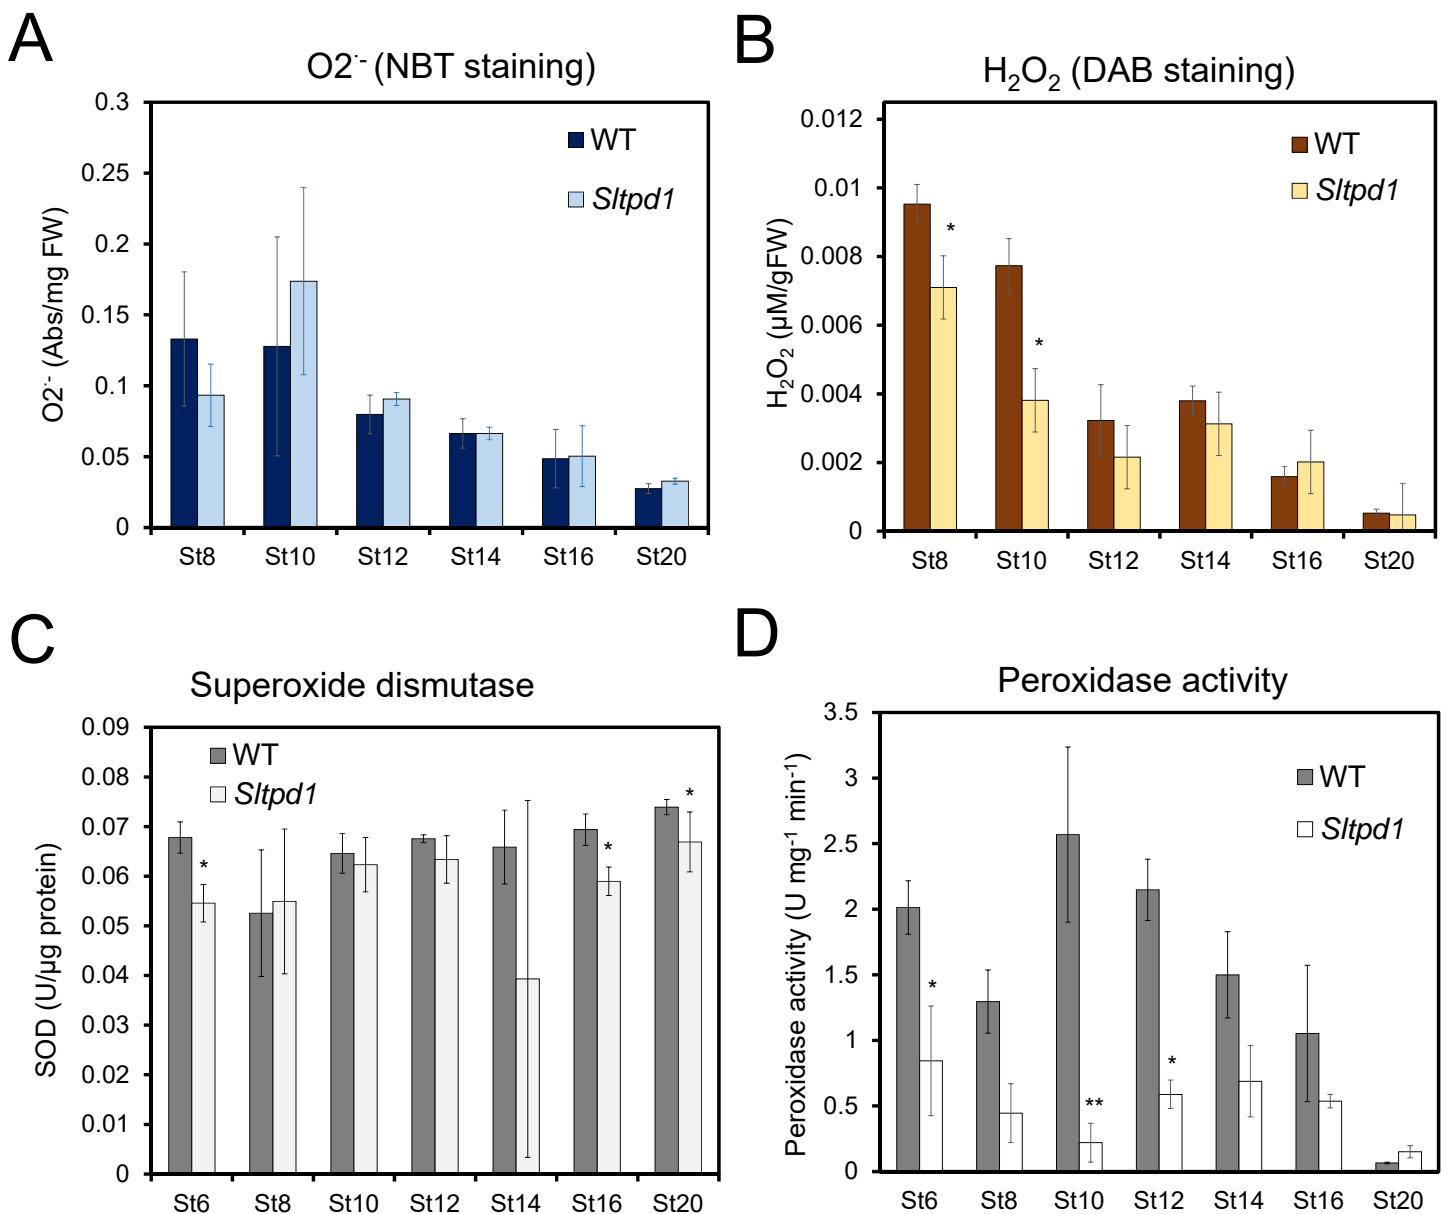

**Figure 9.** Working model summarizing the genetic elements of the redox network affected by the absence of *SITPD1* and the concomitant tapetum loss, at early stages of tomato anther development. Enzymatic ROS accumulation (Orange) is attenuated by ROS scavenging mechanism (Pink). Changes in ROS levels activate signaling pathways (Blue) that result in the induction of genes involved in anther/pollen development. APX: ascorbate peroxidase; GRXs: glutaredoxins; PRX: peroxidases; RBOH: Respiratory burst oxidase homolog; SOD: superoxide dismutase; TGAs: TGA transcription factors.

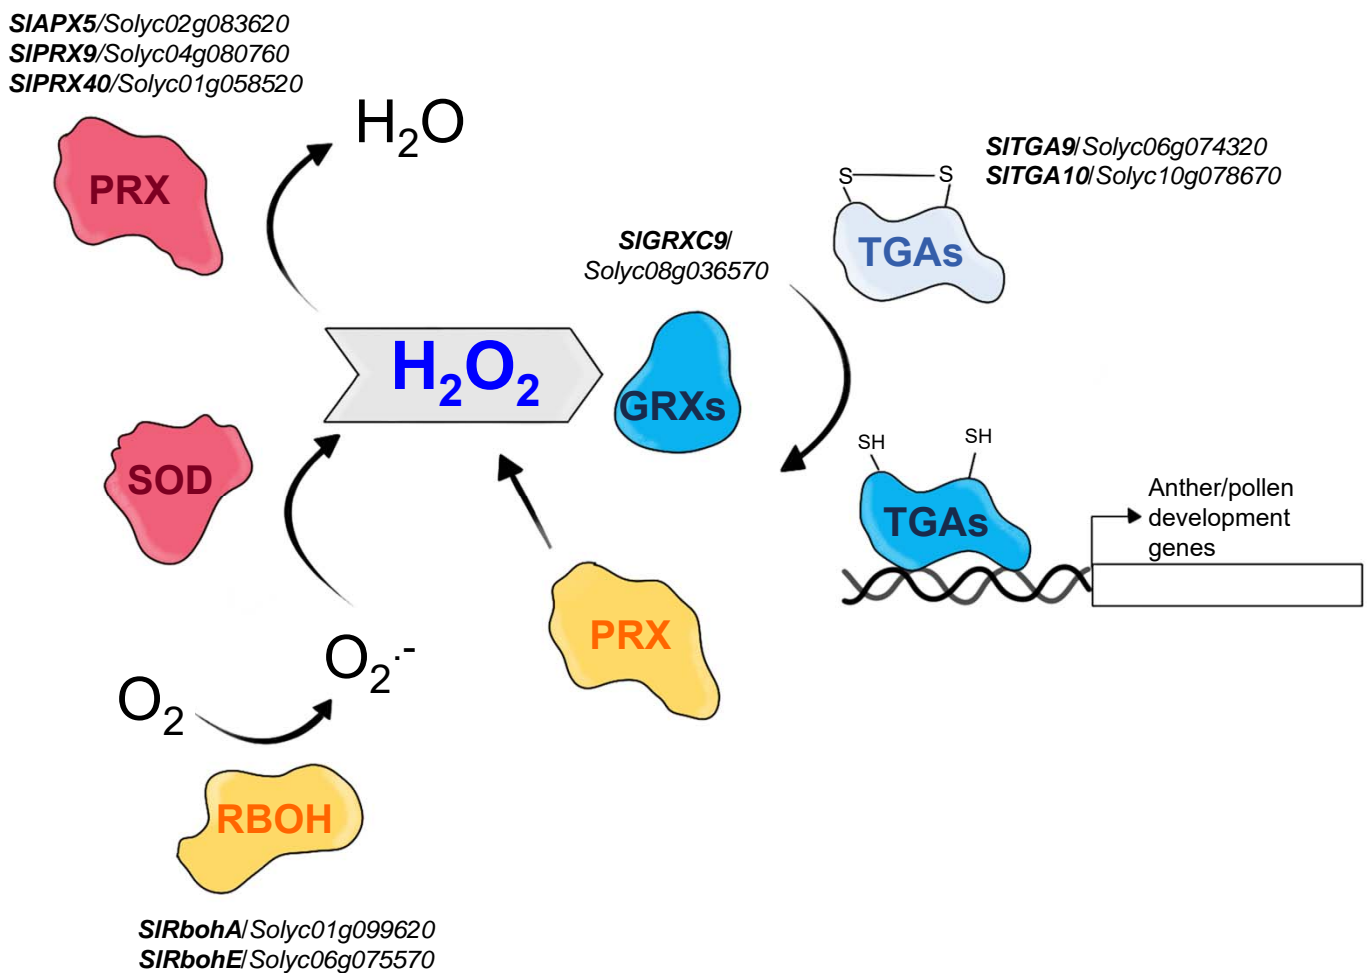

Source: https://www.biorxiv.org/content/10.1101/2021.12.03.471129v1.full.pdf
